# Supplementary material for: Efficient Synthesis of Imine-Carboxylic Acid Functionalized Compounds: Single Crystal, Hirshfeld Surface and Quantum Chemical Exploration
Source: MDPI journal article supplement (doi:10.3390/molecules28072967), 2023-03-27
Supplement: s1 [file s1]

## Efficient Synthesis of Imine-Carboxylic Acid Functionalized Compounds: Single crystal, Hirshfeld Surface and Quantum Chemical Exploration

Muhammad Nawaz Tahir,<sup>1</sup> Akbar Ali,<sup>\*2</sup> Muhammad Khalid,<sup>\*3,4</sup> Muhammad Ashfaq,<sup>1</sup> Mubashir Naveed,<sup>1</sup> Shahzad Murtaza,<sup>3,4</sup> Iqra Shafiq,<sup>3,4</sup>, Muhammad Adnan Asghar,<sup>5</sup> Raha Orfali,<sup>6\*</sup> and Shagufta Perveen,<sup>7</sup>

<sup>1</sup>Department of Physics, University of Sargodha, 40100, Pakistan

<sup>2</sup>Department of Chemistry, Government College University Faisalabad, Faisalabad 38000, Pakistan.

<sup>3</sup>Department of Chemistry, Khwaja Fareed University of Engineering & Information Technology, Rahim Yar Khan, 64200, Pakistan

<sup>4</sup>Centre for Theoretical and Computational Research, Khwaja Fareed University of Engineering & Information Technology, Rahim Yar Khan, 64200, Pakistan

<sup>5</sup>Department of Chemistry, Division of Science and Technology, University of Education Lahore, Pakistan

<sup>6</sup>Department of Pharmacognosy, College of Pharmacy, King Saud University, PO Box 2457, Riyadh 11451, Saudi Arabia

<sup>7</sup>Department of Chemistry, School of Computer, Mathematical and Natural Sciences, Morgan State University, Baltimore, MD, 21251, USA

\*Corresponding authors E-mail addresses: Dr. Akbar Ali: akbarali@gcuf.edu.pk; Muhammad.khalid@kfueit.edu.pk; rorfali@ksu.edu.sa

**Table S1:** SC-XRD experimental details of **HMBA**, **DHBA**.

| Crystal data                       | HMBA                                                                | DHBA                                                             |
|------------------------------------|---------------------------------------------------------------------|------------------------------------------------------------------|
| CCDC                               | 2117442                                                             | 2117443                                                          |
| Molecular formula                  | C <sub>16</sub> H <sub>17</sub> NO <sub>5</sub>                     | C <sub>16</sub> H <sub>15</sub> I <sub>2</sub> NO <sub>4</sub> S |
| <i>M<sub>r</sub></i>               | 303.30                                                              | 571.15                                                           |
| Crystal system, space group        | Orthorhombic, <i>P</i> 2 <sub>1</sub> 2 <sub>1</sub> 2 <sub>1</sub> | Monoclinic, <i>P</i> 2 <sub>1</sub> / <i>c</i>                   |
| Temperature (K)                    | 296                                                                 | 296                                                              |
| <i>a</i> , <i>b</i> , <i>c</i> (Å) | 4.7768 (11), 10.193 (3), 30.479 (7)                                 | 21.441 (4), 5.2059 (9), 17.465 (4)                               |
| $\alpha$ , $\beta$ , $\gamma$ °    | 90, 90, 90                                                          | 90, 102.673 (10), 90                                             |
| <i>V</i> (Å <sup>3</sup> )         | 1484.0 (7)                                                          | 1901.9 (7)                                                       |
| <i>Z</i>                           | 4                                                                   | 4                                                                |
| Density (calculated)               | 1.358 Mg/m <sup>3</sup>                                             | 1.995 Mg/m <sup>3</sup>                                          |
| <i>F</i> (000)                     | 640                                                                 | 1088                                                             |

|                                                                               |                                                                        |                                                                  |
|-------------------------------------------------------------------------------|------------------------------------------------------------------------|------------------------------------------------------------------|
| Radiation type                                                                | Mo $K\alpha$                                                           | Mo $K\alpha$                                                     |
| Wavelength ( $\lambda$ )                                                      | 0.71073 Å                                                              | 0.71073 Å                                                        |
| $\mu$ ( $\text{mm}^{-1}$ )                                                    | 0.102                                                                  | 3.435                                                            |
| Crystal size ( $\text{mm}$ )                                                  | $0.40 \times 0.22 \times 0.16$                                         | $0.43 \times 0.20 \times 0.14$                                   |
| <b>Data collection</b>                                                        |                                                                        |                                                                  |
| Diffractometer                                                                | Bruker APEXII CCD diffractometer                                       | Bruker APEXII CCD diffractometer                                 |
| Absorption correction                                                         | multi-scan (SADABS; Bruker, 2007)                                      | multi-scan (SADABS; Bruker, 2007)                                |
| No. of measured, independent and observed [ $I > 2\sigma(I)$ ] reflections    | 6629, 2753, 1398                                                       | 11274, 4128, 2516                                                |
| $R_{\text{int}}$                                                              | 0.082                                                                  | 0.049                                                            |
| Theta range for data collection ( $^{\circ}$ )                                | 2.673-25.498                                                           | 2.921 -27.000                                                    |
| Index ranges                                                                  | $-5 \leq h \leq 4$ , $-10 \leq k \leq 12$ , $-32 \leq l \leq 36$       | $-25 \leq h \leq 27$ , $-6 \leq k \leq 6$ , $-16 \leq l \leq 22$ |
| $(\sin \theta/\lambda)_{\text{max}}$ ( $\text{\AA}^{-1}$ )                    | 0.606                                                                  | 0.639                                                            |
| <b>Refinement</b>                                                             |                                                                        |                                                                  |
| $R[F^2 > 2\sigma(F^2)]$ , $wR(F^2)$ , $S$                                     | 0.091, 0.189, 1.09                                                     | 0.044, 0.103, 1.01                                               |
| No. of reflections                                                            | 2753                                                                   | 4128                                                             |
| No. of parameters                                                             | 196                                                                    | 186                                                              |
| H-atom treatment                                                              | H atoms treated by a mixture of independent and constrained refinement | H-atom parameters constrained                                    |
| $\Delta\rho_{\text{max}}$ , $\Delta\rho_{\text{min}}$ ( $\text{e \AA}^{-3}$ ) | 0.27, -0.26                                                            | 0.87, -0.75                                                      |

**Table S2:** Comparison of XRD and DFT values of selected bond lengths and bond angles of HMBA using m06/6-311g(d,p).

| Bond lengths |       |       | Bond angles |       |       |
|--------------|-------|-------|-------------|-------|-------|
|              | DFT   | EXP   |             | DFT   | EXP   |
| O1-C1        | 1.202 | 1.207 | O1-C1-O2    | 122.3 | 122.7 |
| O2-C1        | 1.347 | 1.312 | O1-C1-C2    | 125.1 | 123.9 |
| O3-C10       | 1.242 | 1.303 | O2-C1-C2    | 112.6 | 113.4 |
| O4-C11       | 1.346 | 1.357 | O3-C10-C9   | 122.8 | 123.6 |
| O4-C15       | 1.403 | 1.443 | O3-C10-C11  | 121.4 | 119.6 |
| N1-C5        | 1.402 | 1.433 | C11-O4-C15  | 117.4 | 116.8 |
| N1-C8        | 1.33  | 1.278 | O4-C11-C10  | 113   | 112.9 |
| C1-C2        | 1.476 | 1.49  | O4-C11-C12  | 126   | 127.1 |
| C2-C3        | 1.393 | 1.374 | C5-N1-C8    | 126.4 | 125.4 |
| C2-C7        | 1.393 | 1.383 | N1-C5-C4    | 122.3 | 122.3 |

|         |       |       |           |       |       |
|---------|-------|-------|-----------|-------|-------|
| C3-C4   | 1.381 | 1.375 | N1-C5-C6  | 117.7 | 117.2 |
| C4-C5   | 1.395 | 1.371 | N1-C8-C9  | 126.5 | 121.9 |
| C5-C6   | 1.397 | 1.37  | C1-C2-C3  | 122.4 | 122.6 |
| C6-C7   | 1.38  | 1.382 | C1-C2-C7  | 118.3 | 119.7 |
| C8-C9   | 1.384 | 1.427 | C3-C2-C7  | 119.3 | 117.7 |
| C9-C10  | 1.455 | 1.403 | C2-C3-C4  | 120.5 | 122.7 |
| C9-C14  | 1.432 | 1.407 | C2-C7-C6  | 120.7 | 120.4 |
| C10-C11 | 1.46  | 1.451 | C3-C4-C5  | 119.8 | 118.4 |
| C11-C12 | 1.363 | 1.367 | C4-C5-C6  | 120   | 120.5 |
| C12-C13 | 1.427 | 1.399 | C5-C6-C7  | 119.6 | 120.1 |
| C13-C14 | 1.352 | 1.369 | C8-C9-C10 | 120.6 | 119.6 |
| O5-C16  | 1.404 | 1.419 | C8-C9-C14 | 118.7 | 118.8 |

EXP=experiment, DFT=density functional theory

**Table S2:** Continued...

| Bond angles |       |       |
|-------------|-------|-------|
|             | DFT   | EXP   |
| C10-C9-C14  | 120.8 | 121.6 |
| C9-C10-C11  | 115.8 | 116.8 |
| C9-C14-C13  | 120.5 | 120.2 |
| C10-C11-C12 | 121   | 120.1 |
| C11-C12-C13 | 121.6 | 121.7 |
| C12-C13-C14 | 120.3 | 119.7 |

EXP=experiment, DFT=density functional theory

**Table S3:** Comparison of XD and DFT values of selected bond lengths and bond angles of **DHB** using m06/6-311g(d,p).

| Bond lengths |       |       | Bond angles |       |       |
|--------------|-------|-------|-------------|-------|-------|
|              | DFT   | EXP   |             | DFT   | EXP   |
| I1-C13       | 2.13  | 2.094 | I1-C13-C28  | 119.5 | 120.6 |
| I2-C11       | 2.12  | 2.082 | I1-C13-C14  | 120.2 | 119.7 |
| O1-C1        | 1.21  | 1.196 | I2-C11-C10  | 119.2 | 119.1 |
| O2-C1        | 1.347 | 1.311 | I2-C11-C12  | 119.6 | 119.3 |
| O3-C10       | 1.325 | 1.318 | O1-C1-O2    | 122.4 | 122.8 |
| N1-C5        | 1.401 | 1.409 | O1-C1-C2    | 124.8 | 124.3 |
| N1-C8        | 1.286 | 1.272 | O2-C1-C2    | 112.8 | 112.8 |
| C1-C2        | 1.479 | 1.474 | O3-C10-C9   | 122.2 | 121.3 |
| C2-C3        | 1.396 | 1.39  | O3-C10-C11  | 119.6 | 120.4 |
| C2-C7        | 1.397 | 1.347 | C5-N1-C8    | 120.8 | 122.9 |
| C3-C4        | 1.386 | 1.389 | N1-C5-C4    | 122.4 | 122.7 |
| C4-C5        | 1.401 | 1.39  | N1-C5-C6    | 117.9 | 117.3 |
| C5-C6        | 1.4   | 1.39  | N1-C8-C9    | 122.5 | 121.9 |
| C6-C7        | 1.383 | 1.389 | C1-C2-C3    | 122.3 | 121.5 |
| C8-C9        | 1.448 | 1.428 | C1-C2-C7    | 117.9 | 119.7 |
| C9-C10       | 1.419 | 1.416 | C3-C2-C7    | 119.8 | 116.9 |
| C9-C14       | 1.402 | 1.384 | C2-C3-C4    | 120.1 | 120   |
| C10-C11      | 1.404 | 1.398 | C2-C7-C6    | 120.2 | 120.5 |

|         |       |       |            |       |       |
|---------|-------|-------|------------|-------|-------|
| C11-C12 | 1.386 | 1.366 | C3-C4-C5   | 120   | 120   |
| C12-C13 | 1.397 | 1.388 | C4-C5-C6   | 119.7 | 120   |
| C13-C14 | 1.38  | 1.373 | C5-C6-C7   | 120   | 120   |
| S1-O4   | 1.497 | 1.508 | C8-C9-C10  | 121.1 | 120.9 |
| S1-C15  | 1.824 | 1.754 | C8-C9-C14  | 118.8 | 120.2 |
| S1-C16  | 1.82  | 1.758 | C10-C9-C14 | 120.1 | 118.9 |

EXP=experiment, DFT=density functional theory

**Table S3:** Continued...

| <b>Bond angles</b> |            |            |
|--------------------|------------|------------|
|                    | <b>DFT</b> | <b>EXP</b> |
| C9-C10-C11         | 118.1      | 118.3      |
| C9-C15-C13         | 120.3      | 121.6      |
| C10-C11-C12        | 121.3      | 121.5      |
| C11-C12-C13        | 119.9      | 119.9      |
| C12-C13-C14        | 120.3      | 119.6      |
| O4-S1-C15          | 106.8      | 108.1      |
| O4-S1-C16          | 107.1      | 105.7      |
| C15-S1-C16         | 94.5       | 98.2       |

EXP=experiment, DFT=density functional theory

**Table S4:** Enrichment ratio of pair of chemical species of the **HMBA**. The enrichment ratio is not calculated for pair of chemical species for which random contact is less than 0.9%.

| <b>Contact %</b>                        | <b>Atom</b> | <b>H</b> | <b>C</b> | <b>N</b> | <b>O</b> |
|-----------------------------------------|-------------|----------|----------|----------|----------|
|                                         | <b>H</b>    | 42.2     | 15.4     | 0        | 31.1     |
|                                         | <b>C</b>    | 15.4     | 7.2      | 2.3      | 1.7      |
|                                         | <b>N</b>    | 0        | 2.3      | 0        | 0        |
|                                         | <b>O</b>    | 31.1     | 1.7      | 0        | 0.2      |
| <b>Surface% S<sub>xy</sub></b>          |             | 65.45    | 16.9     | 1.15     | 16.6     |
| <b>Random Contacts % R<sub>xy</sub></b> | <b>Atom</b> | <b>H</b> | <b>C</b> | <b>N</b> | <b>O</b> |
|                                         | <b>H</b>    | 42.84    | -        | -        | -        |
|                                         | <b>C</b>    | 22.12    | 2.86     | -        | -        |
|                                         | <b>N</b>    | 1.51     | 0.39     | 0.01     |          |
|                                         | <b>O</b>    | 21.73    | 5.61     | 0.38     | 2.76     |
| <b>Enrichment ratio E<sub>CH</sub></b>  | <b>Atom</b> | <b>H</b> | <b>C</b> | <b>N</b> | <b>O</b> |
|                                         | <b>H</b>    | 0.99     | -        | -        | -        |
|                                         | <b>C</b>    | 0.70     | 2.52     | -        | -        |
|                                         | <b>N</b>    | 0.00     | -        | -        | -        |
|                                         | <b>O</b>    | 1.43     | 0.30     | -        | 0.07     |

**Table S5:** Enrichment ratio of pair of chemical species of the **DHBA**. The enrichment ratio is not calculated for pair of chemical species for which random contact is less than 0.9%.

| <b>Contact %</b> | <b>Atom</b> | <b>H</b> | <b>C</b> | <b>N</b> | <b>O</b> | <b>S</b> | <b>I</b> |
|------------------|-------------|----------|----------|----------|----------|----------|----------|
|                  | <b>H</b>    | 22.1     | 13.6     | 1.1      | 24.3     | 3.9      | 17.3     |
|                  | <b>C</b>    | 13.6     | 2.4      | 0        | 3.1      | 0        | 4        |

|                                             |             |          |          |          |          |          |          |
|---------------------------------------------|-------------|----------|----------|----------|----------|----------|----------|
|                                             | <b>N</b>    | 1.1      | 0        | 0        | 0.1      | 0        | 0        |
|                                             | <b>O</b>    | 24.3     | 3.1      | 0        | 0.3      | 0        | 0        |
|                                             | <b>S</b>    | 3.9      | 0        | 0        | 0        | 0        | 0        |
|                                             | <b>I</b>    | 17.3     | 4        | 0        | 0        | 0        | 7.3      |
| <b>Surface% S<sub>XY</sub></b>              |             | 52.2     | 12.75    | 0.55     | 14.05    | 1.95     | 17.95    |
| <b>Random Contacts<br/>% R<sub>XY</sub></b> | <b>Atom</b> | <b>H</b> | <b>C</b> | <b>N</b> | <b>O</b> | <b>S</b> | <b>I</b> |
|                                             | <b>H</b>    | 27.25    |          |          |          |          |          |
|                                             | <b>C</b>    | 13.31    | 1.63     |          |          |          |          |
|                                             | <b>N</b>    | 0.57     | 0.14     | 0.00     |          |          |          |
|                                             | <b>O</b>    | 14.67    | 3.58     | 0.15     | 1.97     |          |          |
|                                             | <b>S</b>    | 2.04     | 0.50     | 0.02     | 0.55     | 0.04     |          |
|                                             | <b>I</b>    | 18.74    | 4.58     | 0.20     | 5.04     | 0.70     | 3.22     |
| <b>Enrichment ratio<br/>E<sub>CH</sub></b>  | <b>Atom</b> | <b>H</b> | <b>C</b> | <b>N</b> | <b>O</b> | <b>S</b> | <b>I</b> |
|                                             | <b>H</b>    | 0.81     | -        | -        | -        | -        | -        |
|                                             | <b>C</b>    | 1.02     | 1.48     | -        | -        | -        | -        |
|                                             | <b>N</b>    | -        | -        | -        | -        | -        | -        |
|                                             | <b>O</b>    | 1.66     | 0.87     | -        | 0.15     | -        | -        |
|                                             | <b>S</b>    | 1.92     | -        | -        | -        | -        | -        |
|                                             | <b>I</b>    | 0.92     | 0.87     | -        | 0        | -        | 2.27     |

**Table S6:** Natural bond orbital (NBO) analysis of **HMBA** compound.

| <b>Donor(i)</b> | <b>Type</b> | <b>Acceptor(j)</b> | <b>Type</b> | <b>E(2)<sup>a</sup> [kJ/mol]</b> | <b>E(J)E(i)<sup>b</sup>(a.u)</b> | <b>F(I,j)<sup>c</sup>(a.u)</b> |
|-----------------|-------------|--------------------|-------------|----------------------------------|----------------------------------|--------------------------------|
| C8-H20          | σ           | C9-C10             | σ*          | 5.15                             | 1.06                             | 0.066                          |
| C3-H11          | σ           | C4-C5              | σ*          | 4.39                             | 1.09                             | 0.062                          |
| C13-H27         | σ           | C11-C12            | σ*          | 3.78                             | 1.13                             | 0.058                          |
| C9-C10          | σ           | O3-C10             | σ*          | 2.02                             | 1.25                             | 0.045                          |
| C15-H31         | σ           | O4-C11             | σ*          | 0.55                             | 0.92                             | 0.02                           |
| C4-C5           | π           | C2-C3              | π*          | 26.32                            | 0.31                             | 0.08                           |
| C6-C7           | π           | C4-C5              | π*          | 25.27                            | 0.29                             | 0.077                          |
| C2-C3           | π           | C6-C7              | π*          | 23.4                             | 0.3                              | 0.077                          |
| C2-C3           | π           | O1-C1              | π*          | 22.93                            | 0.29                             | 0.075                          |
| C11-C12         | π           | O3-C10             | π*          | 22.75                            | 0.3                              | 0.077                          |
| C2-C3           | π           | C4-C5              | π*          | 19.41                            | 0.29                             | 0.067                          |
| C6-C7           | π           | C2-C3              | π*          | 19.2                             | 0.3                              | 0.068                          |
| C4-C5           | π           | C6-C7              | π*          | 16.96                            | 0.31                             | 0.066                          |
| C13-C14         | π           | C11-C12            | π*          | 16.48                            | 0.31                             | 0.066                          |
| N1-C8           | π           | C4-C5              | π*          | 15.95                            | 0.4                              | 0.078                          |
| C11-C12         | π           | C13-C14            | π*          | 15.18                            | 0.33                             | 0.064                          |
| C4-C5           | π           | N1-C8              | π*          | 7.97                             | 0.24                             | 0.04                           |
| C2-C3           | π           | C2-C3              | π*          | 0.61                             | 0.3                              | 0.012                          |
| O2              | LP(2)       | O1-C1              | π*          | 47.09                            | 0.37                             | 0.121                          |
| O1              | LP(2)       | O2-C1              | σ*          | 34.41                            | 0.65                             | 0.135                          |
| O4              | LP(2)       | C11-C12            | π*          | 34.12                            | 0.37                             | 0.103                          |
| O3              | LP(2)       | C10-C11            | σ*          | 18.71                            | 0.78                             | 0.109                          |
| O1              | LP(2)       | C1-C2              | σ*          | 18.6                             | 0.74                             | 0.107                          |
| O3              | LP(2)       | C9-C10             | σ*          | 13.65                            | 0.79                             | 0.094                          |

|    |       |         |            |      |      |       |
|----|-------|---------|------------|------|------|-------|
| O3 | LP(2) | N1-H7   | $\sigma^*$ | 7.91 | 0.68 | 0.067 |
| O4 | LP(1) | C11-C12 | $\sigma^*$ | 7.32 | 1.18 | 0.083 |

**Table S7:** Natural bond orbital (NBO) analysis of **DHBA** compound.

| Donor(i) | Type     | Acceptor(j) | Type       | E(2) <sup>a</sup> [kJ/mol] | E(J)E(i) <sup>b</sup> (a.u) | F(I,j) <sup>c</sup> (a.u) |
|----------|----------|-------------|------------|----------------------------|-----------------------------|---------------------------|
| C9-C10   | $\sigma$ | C10-C11     | $\sigma^*$ | 6.42                       | 1.26                        | 0.08                      |
| O3-H7    | $\sigma$ | C10-C11     | $\sigma^*$ | 5.83                       | 1.3                         | 0.078                     |
| C11-C12  | $\sigma$ | C12-C13     | $\sigma^*$ | 5.51                       | 1.31                        | 0.076                     |
| I2-C11   | $\sigma$ | C12-C13     | $\sigma^*$ | 5.03                       | 1.07                        | 0.065                     |
| C6-C7    | $\sigma$ | C2-C7       | $\sigma^*$ | 3.9                        | 1.3                         | 0.064                     |
| C11-C12  | $\sigma$ | O3-C10      | $\sigma^*$ | 3.22                       | 1.15                        | 0.054                     |
| N1-C8    | $\sigma$ | C5-C6       | $\sigma^*$ | 2.14                       | 1.48                        | 0.05                      |
| C5-C6    | $\sigma$ | N1-C5       | $\sigma^*$ | 2.01                       | 1.15                        | 0.043                     |
| O3-H7    | $\sigma$ | N1-C5       | $\sigma^*$ | 0.52                       | 1.21                        | 0.022                     |
| C10-C11  | $\pi$    | C12-C13     | $\pi^*$    | 30.68                      | 0.3                         | 0.086                     |
| C12-C13  | $\pi$    | C9-C14      | $\pi^*$    | 28.03                      | 0.3                         | 0.084                     |
| C9-C14   | $\pi$    | C10-C11     | $\pi^*$    | 26.58                      | 0.28                        | 0.078                     |
| C4-C5    | $\pi$    | C2-C3       | $\pi^*$    | 25.93                      | 0.3                         | 0.079                     |
| C6-C7    | $\pi$    | C4-C5       | $\pi^*$    | 24.77                      | 0.29                        | 0.077                     |
| C9-C14   | $\pi$    | N1-C8       | $\pi^*$    | 24.08                      | 0.29                        | 0.078                     |
| C2-C3    | $\pi$    | C6-C7       | $\pi^*$    | 22.65                      | 0.3                         | 0.076                     |
| C2-C3    | $\pi$    | O1-C1       | $\pi^*$    | 22.31                      | 0.29                        | 0.074                     |
| C6-C7    | $\pi$    | C2-C3       | $\pi^*$    | 19.88                      | 0.3                         | 0.069                     |
| C2-C3    | $\pi$    | C4-C5       | $\pi^*$    | 19.52                      | 0.29                        | 0.068                     |
| C9-C14   | $\pi$    | C12-C13     | $\pi^*$    | 18.3                       | 0.29                        | 0.065                     |
| C4-C6    | $\pi$    | C6-C7       | $\pi^*$    | 17.44                      | 0.31                        | 0.067                     |
| C12-C13  | $\pi$    | C10-C11     | $\pi^*$    | 16.07                      | 0.29                        | 0.062                     |
| C10-C11  | $\pi$    | C9-C14      | $\pi^*$    | 15.69                      | 0.31                        | 0.063                     |
| N1-C8    | $\pi$    | C4-C5       | $\pi^*$    | 10.09                      | 0.4                         | 0.061                     |
| C4-C5    | $\pi$    | N1-C8       | $\pi^*$    | 8.22                       | 0.28                        | 0.045                     |
| N1-C8    | $\pi$    | C9-C14      | $\pi^*$    | 7.06                       | 0.38                        | 0.051                     |
| C9-C14   | $\pi$    | C9-C14      | $\pi^*$    | 0.67                       | 0.29                        | 0.013                     |
| O2       | LP(2)    | O1-C1       | $\pi^*$    | 47.53                      | 0.37                        | 0.121                     |
| O3       | LP(2)    | C10-C11     | $\pi^*$    | 42.41                      | 0.34                        | 0.115                     |
| O1       | LP(2)    | O2-C1       | $\sigma^*$ | 34.35                      | 0.65                        | 0.135                     |
| N1       | LP(1)    | O3-H7       | $\sigma^*$ | 21.77                      | 0.79                        | 0.12                      |
| O1       | LP(2)    | C1-C2       | $\sigma^*$ | 18.72                      | 0.73                        | 0.107                     |
| N1       | LP(1)    | C8-H21      | $\sigma^*$ | 11.86                      | 0.74                        | 0.086                     |
| O3       | LP(1)    | C9-C10      | $\sigma^*$ | 8.12                       | 1.13                        | 0.086                     |
| O2       | LP(1)    | O1-C1       | $\sigma^*$ | 6.1                        | 1.26                        | 0.078                     |
| N1       | LP(1)    | C4-C5       | $\sigma^*$ | 5.78                       | 0.95                        | 0.068                     |
| N1       | LP(1)    | C4-C5       | $\pi^*$    | 5.65                       | 0.41                        | 0.046                     |
| I2       | LP(2)    | C11-C12     | $\sigma^*$ | 2.14                       | 0.84                        | 0.038                     |
| I2       | LP(1)    | C10-C11     | $\sigma^*$ | 0.54                       | 1.15                        | 0.023                     |

Com= compounds; LP= lone pair, (j) acceptor, (i) donor,  $E^{(2)}$  means energy of hyper conjugative interaction (stabilization energy),  $F(i, j)$  is the Fock matrix element between i and j NBO orbitals,  $E(j)-E(i)$  is the energy difference between donor and acceptor i and j NBO orbitals.

**Table S8:** Dipole polarizability and major contributing tensors (*a.u.*) of **HMBA** and **DHBA** compounds.

| Dipole Moment | HMBA  | DHBA  | Polarizability   | HMBA   | DHBA   |
|---------------|-------|-------|------------------|--------|--------|
| $\mu_x$       | -2.74 | 0.84  | $\alpha_{xx}$    | 528.79 | 436.95 |
| $\mu_y$       | -5.55 | 5.68  | $\alpha_{yy}$    | 278.96 | 262.83 |
| $\mu_z$       | -2.06 | -0.43 | $\alpha_{zz}$    | 132.68 | 166.58 |
| $\mu_{total}$ | 6.53  | 5.76  | $\alpha_{total}$ | 313.48 | 288.79 |

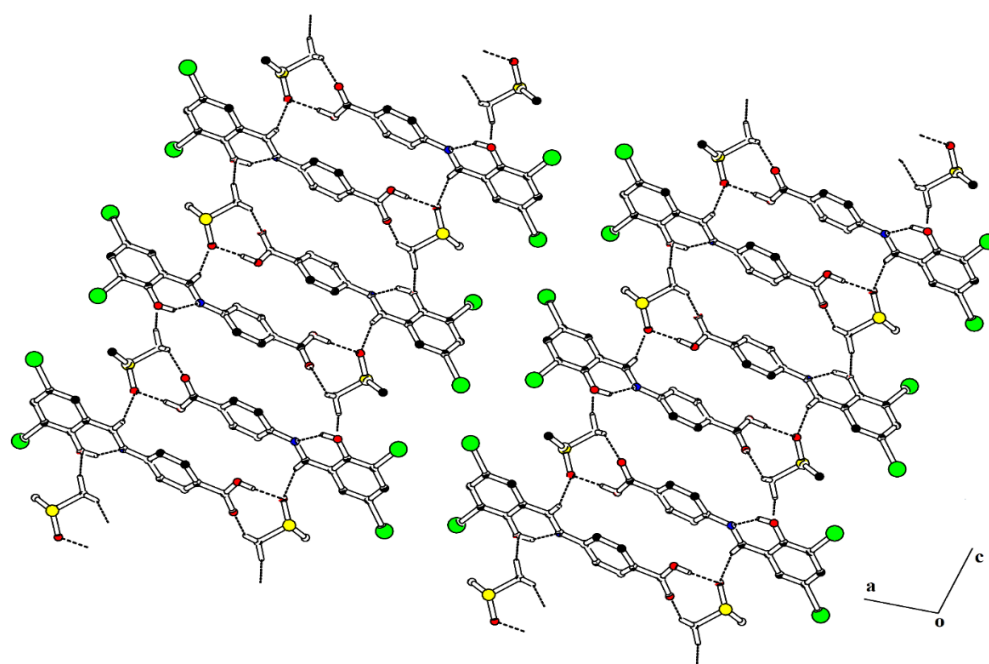

**Figure S1.** Intermolecular and intramolecular H-bonding in packed crystal structure of **DHBA**. Selected H-atoms are shown for clarity.

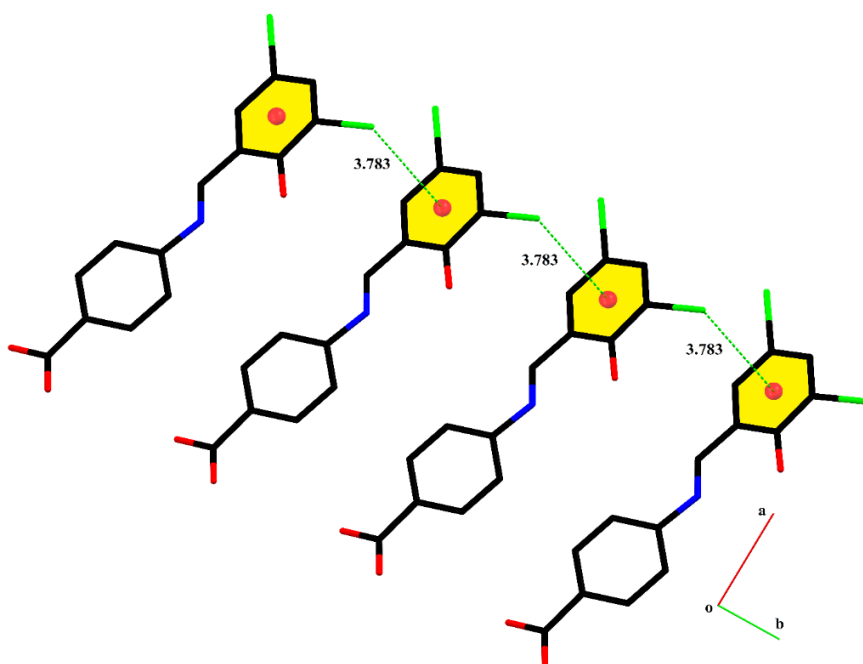

**Figure S2.** Graphical illustration of C-I... $\pi$  interactions in DHBA. H-atoms and solvent molecules are not represented for simplicity.

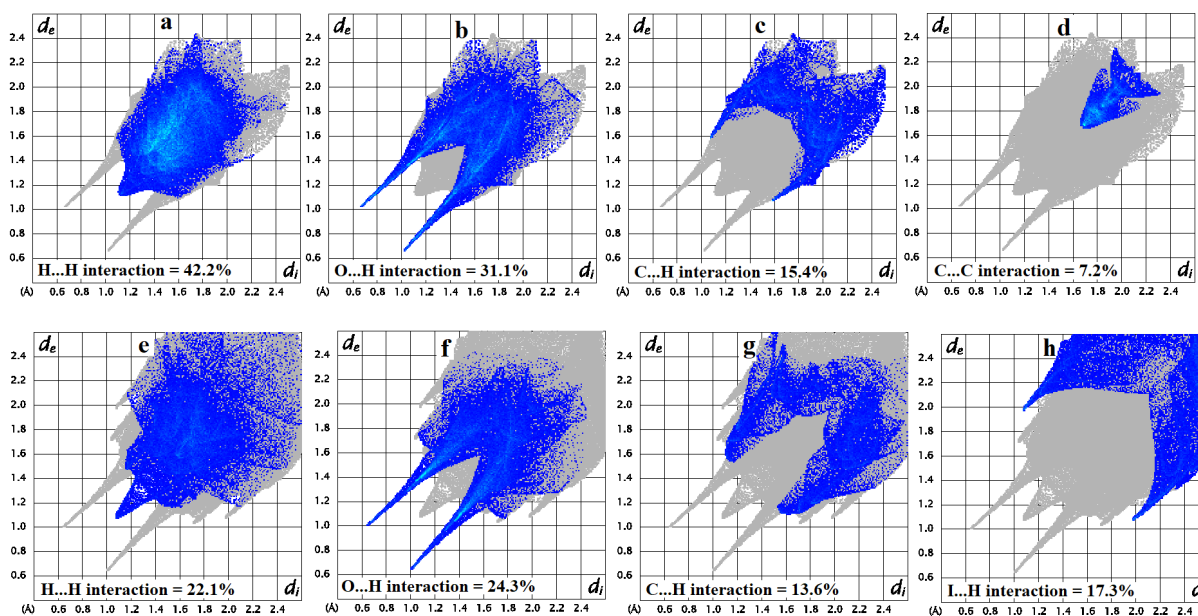

**Figure S3.** Important 2 D finger print plots for (a-d) HMBA, (e-h) DHBA.



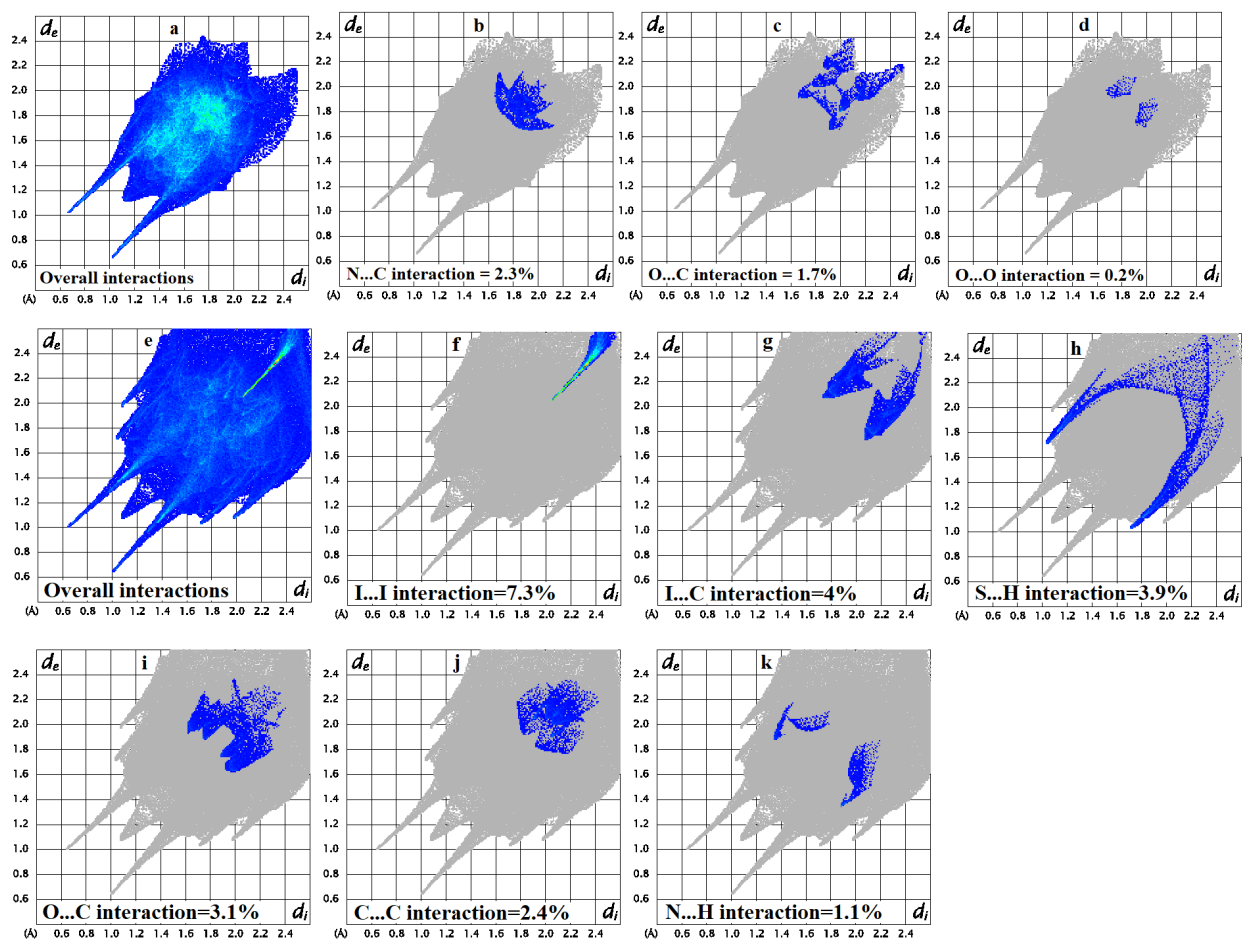

**Figure S4.** Remaining 2D finger print plots (a-d) for **HMBA** and (e-k) for **DHBA**. The 2d plot of the interatomic contacts with contribution less than 1% are not shown.

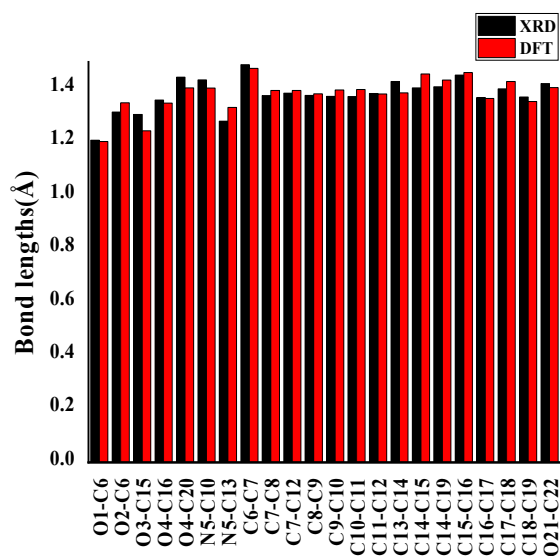

HMBA

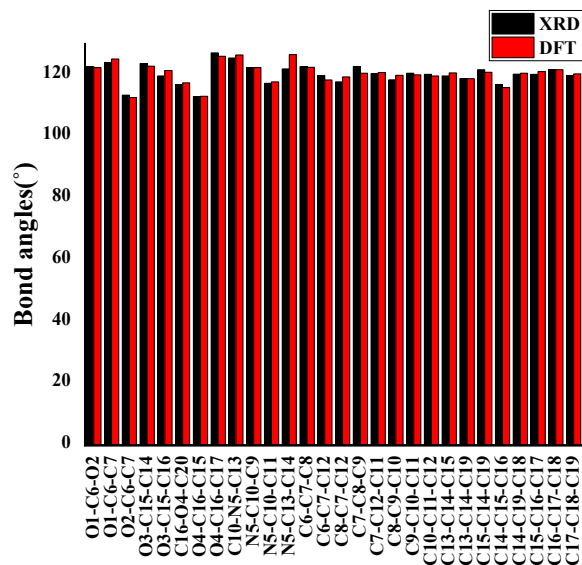

HMBA

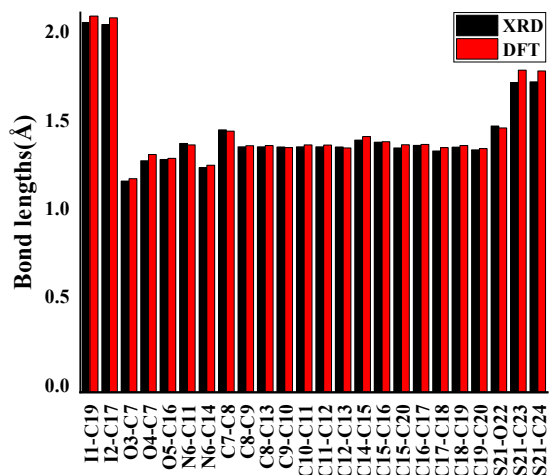

DHBA

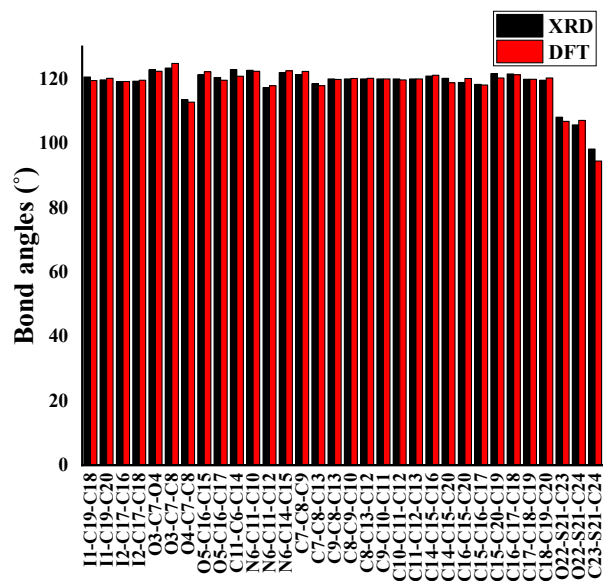

DHBA

Figure S5: Bond lengths (Å) and bond angles (°) for HMBA and DHBA.

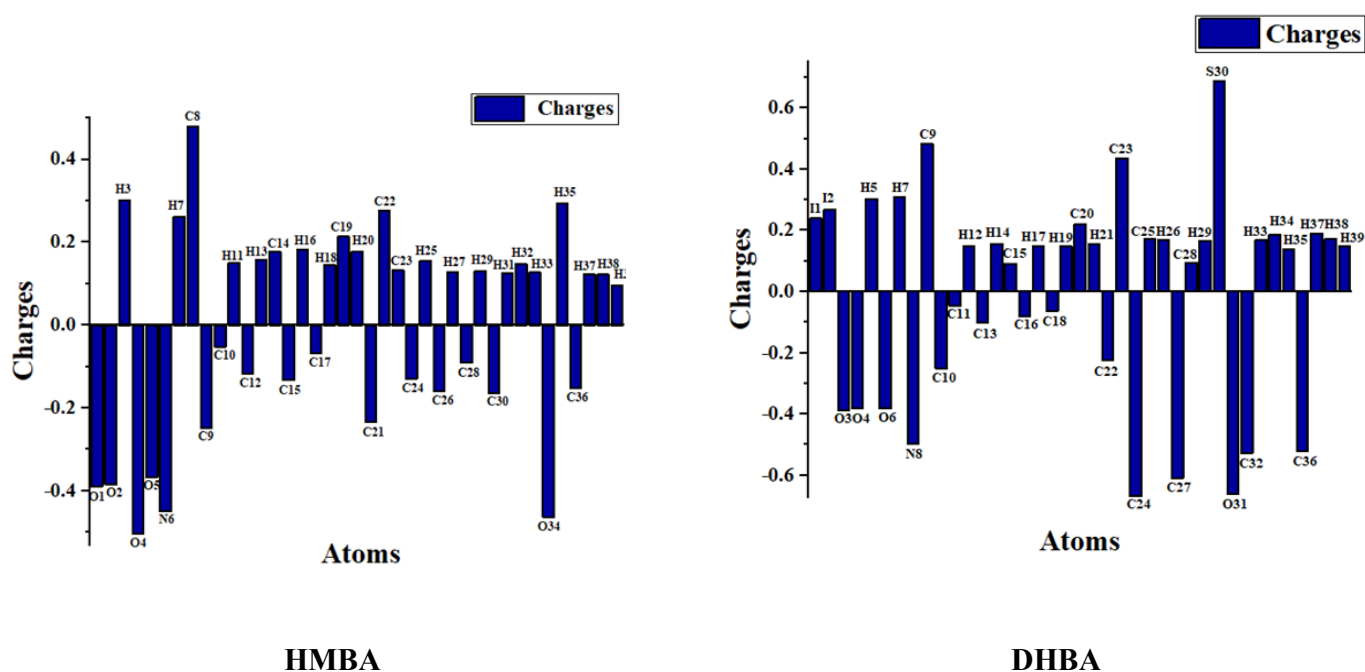

**Figure S6.** The natural charge distribution of **HMBA** and **DHBA** compounds.

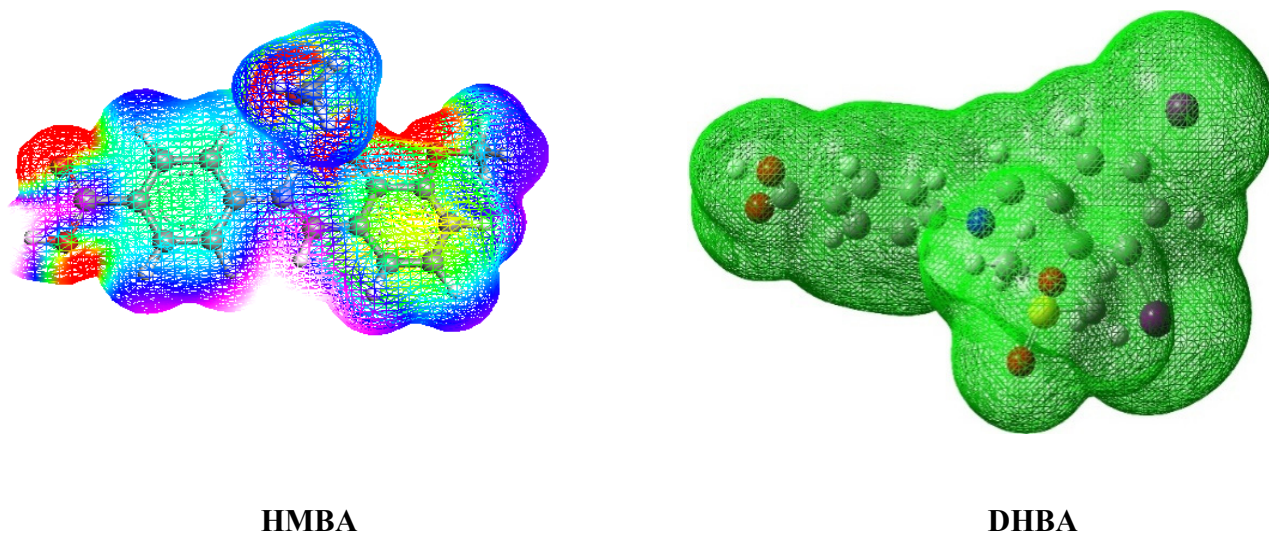

**Figure S7.** MEPs and color scheme of the investigated compounds: **HMBA** and **DHBA**.

#### checkCIF/PLATON report of HMBA

Structure factors have been supplied for datablock(s) HMBA

THIS REPORT IS FOR GUIDANCE ONLY. IF USED AS PART OF A REVIEW PROCEDURE FOR PUBLICATION, IT SHOULD NOT REPLACE THE EXPERTISE OF AN EXPERIENCED CRYSTALLOGRAPHIC REFEREE.

No syntax errors found. CIF dictionary Interpreting this report

**Datablock: HMBA**

---

Bond precision: C-C = 0.0097 Å Wavelength=0.71073  
Cell: a=4.7768(11) b=10.193(3) c=30.479(7)  
alpha=90 beta=90 gamma=90  
Temperature: 296 K

|                | Calculated           | Reported             |
|----------------|----------------------|----------------------|
| Volume         | 1484.0(7)            | 1484.0(7)            |
| Space group    | P 21 21 21           | P 21 21 21           |
| Hall group     | P 2ac 2ab            | P 2ac 2ab            |
| Moiety formula | C15 H13 N O4, C H4 O | C15 H13 N O4, C H4 O |
| Sum formula    | C16 H17 N O5         | C16 H17 N O5         |
| Mr             | 303.31               | 303.30               |
| Dx,g cm-3      | 1.358                | 1.358                |
| Z              | 4                    | 4                    |
| Mu (mm-1)      | 0.102                | 0.102                |
| F000           | 640.0                | 640.0                |
| F000'          | 640.36               |                      |
| h,k,lmax       | 5,12,36              | 5,12,36              |
| Nref           | 2766[ 1659]          | 2753                 |
| Tmin,Tmax      | 0.973,0.984          | 0.915,0.975          |
| Tmin'          | 0.960                |                      |

Correction method= # Reported T Limits: Tmin=0.915 Tmax=0.975 AbsCorr =  
MULTI-SCAN

Data completeness= 1.66/1.00 Theta(max)= 25.498

R(reflections)= 0.0910( 1398) wR2(reflections)=  
0.1885( 2753)  
S = 1.087 Npar= 196

The following ALERTS were generated. Each ALERT has the format

**test-name\_ALERT\_alert-type\_alert-level.**

Click on the hyperlinks for more details of the test.

### Alert level C

|                   |                                                                                                                                                                                     |         |       |
|-------------------|-------------------------------------------------------------------------------------------------------------------------------------------------------------------------------------|---------|-------|
| STRVA01_ALERT_4_C | Flack test results are meaningless. From the<br>CIF: <a href="#">_refine_ls_abs_structure_Flack</a> -0.100<br>From the CIF: <a href="#">_refine_ls_abs_structure_Flack_su</a> 1.000 |         |       |
| PLAT340_ALERT_3_C | Low Bond Precision on C-C Bonds .....                                                                                                                                               | 0.00971 | Ang.  |
| PLAT906_ALERT_3_C | Large K Value in the Analysis of Variance .....                                                                                                                                     | 2.744   | Check |
| PLAT906_ALERT_3_C | Large K Value in the Analysis of Variance .....                                                                                                                                     | 2.746   | Check |

| Alert level G     |                                                  |       |        |
|-------------------|--------------------------------------------------|-------|--------|
| PLAT002_ALERT_2_G | Number of Distance or Angle Restraints on AtSite | 6     | Note   |
| PLAT003_ALERT_2_G | Number of Uiso or Uij Restrained non-H Atoms ... | 14    | Report |
| PLAT007_ALERT_5_G | Number of Unrefined Donor-H Atoms .....          | 1     | Report |
| PLAT032_ALERT_4_G | Std. Uncertainty on Flack Parameter Value High . | 1.000 | Report |
| PLAT172_ALERT_4_G | The CIF-Embedded .res File Contains DFIX Records | 1     | Report |
| PLAT178_ALERT_4_G | The CIF-Embedded .res File Contains SIMU Records | 2     | Report |
| PLAT309_ALERT_2_G | Single Bonded Oxygen (C-O > 1.3 Ang) .....       | O3    | Check  |
| PLAT910_ALERT_3_G | Missing # of FCF Reflection(s) Below Theta(Min). | 3     | Note   |
| PLAT916_ALERT_2_G | Hooft y and Flack x Parameter Values Differ by . | 0.50  | Check  |
| PLAT933_ALERT_2_G | Number of HKL-OMIT Records in Embedded .res File | 2     | Note   |
| PLAT941_ALERT_3_G | Average HKL Measurement Multiplicity .....       | 4.0   | Low    |
| PLAT967_ALERT_5_G | Note: Two-Theta Cutoff Value in Embedded .res .. | 51.0  | Degree |
| PLAT978_ALERT_2_G | Number C-C Bonds with Positive Residual Density. | 1     | Info   |

0 ALERT level A = Most likely a serious problem - resolve or explain

0 ALERT level B = A potentially serious problem, consider carefully

4 ALERT level C = Check. Ensure it is not caused by an omission or oversight

13 ALERT level G = General information/check it is not something unexpected

|   |     |        |                                                              |
|---|-----|--------|--------------------------------------------------------------|
| 0 | ALE | type 1 | CIF construction/syntax error, inconsistent or missing data  |
|   | RT  |        |                                                              |
| 6 | ALE | type 2 | Indicator that the structure model may be wrong or deficient |
|   | RT  |        |                                                              |
| 5 | ALE | type 3 | Indicator that the structure quality may be low              |
|   | RT  |        |                                                              |
| 4 | ALE | type 4 | Improvement, methodology, query or suggestion                |
|   | RT  |        |                                                              |
| 2 | ALE | type 5 | Informative message, check                                   |
|   | RT  |        |                                                              |

---



---

It is advisable to attempt to resolve as many as possible of the alerts in all categories. Often the minor alerts point to easily fixed oversights, errors and omissions in your CIF or refinement strategy, so attention to these fine details can be worthwhile. In order to resolve some of the more serious problems it may be necessary to carry out additional measurements or structure refinements. However, the purpose of your study may justify the reported deviations and the more serious of these should normally be commented upon in the discussion or experimental section of a paper or in the "special\_details" fields of the CIF. checkCIF was carefully designed to identify outliers and unusual parameters, but every test has its limitations and alerts that are not important in a particular case may appear. Conversely, the absence of alerts does not guarantee there are no aspects of the results needing attention. It is up to the individual to critically assess their own results and, if necessary, seek expert advice.

### **Publication of your CIF in IUCr journals**

A basic structural check has been run on your CIF. These basic checks will be run on all CIFs submitted for publication in IUCr journals (*Acta Crystallographica*, *Journal of Applied Crystallography*, *Journal of Synchrotron Radiation*); however, if you intend to submit to *Acta Crystallographica Section C* or *E* or *IUCrData*, you should make sure that full publication checks are run on the final version of your CIF prior to submission.

### **Publication of your CIF in other journals**

Please refer to the *Notes for Authors* of the relevant journal for any special instructions relating to CIF submission.

## Datablock new4abovan\_0m - ellipsoid plot

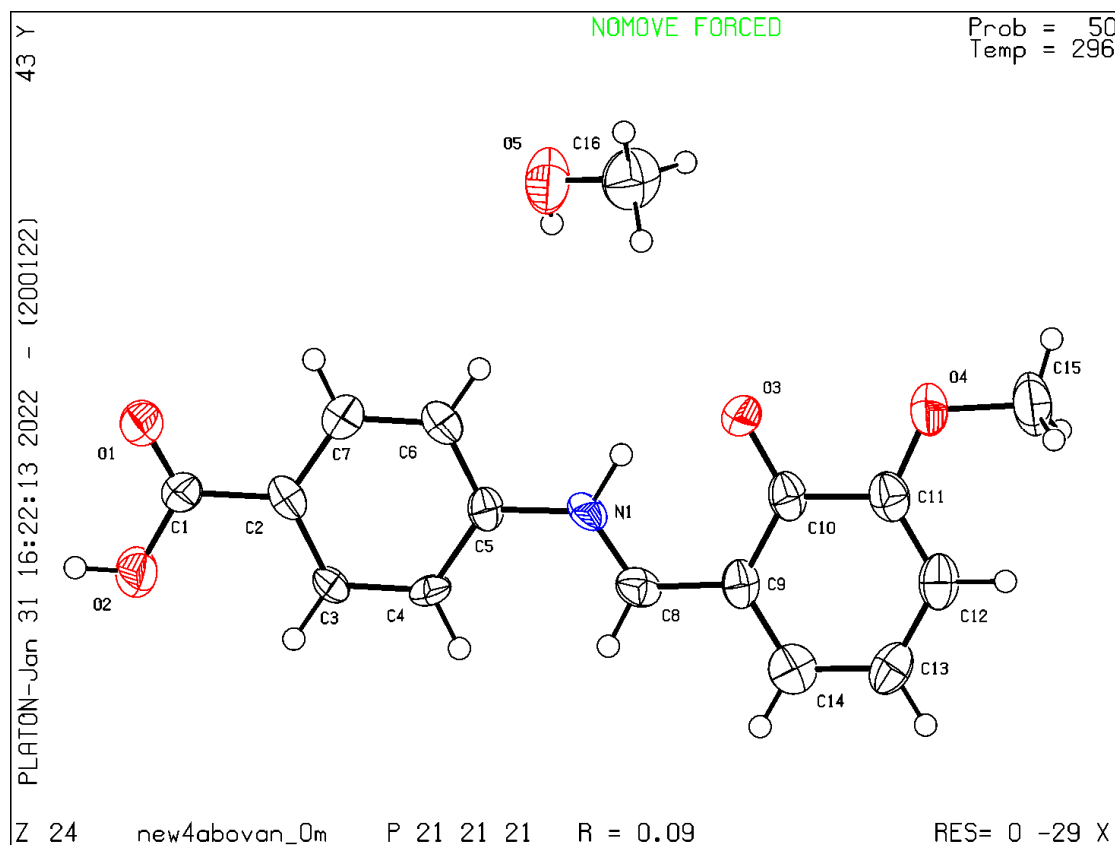

## checkCIF/PLATON report of DHBA

Structure factors have been supplied for datablock(s) DHBA

THIS REPORT IS FOR GUIDANCE ONLY. IF USED AS PART OF A REVIEW PROCEDURE FOR PUBLICATION, IT SHOULD NOT REPLACE THE EXPERTISE OF AN EXPERIENCED CRYSTALLOGRAPHIC REFEREE.

No syntax errors found. CIF dictionary Interpreting this report

## Datablock: DHBA

---



|                 |                |                    |             |
|-----------------|----------------|--------------------|-------------|
| Bond precision: | C-C = 0.0071 Å | Wavelength=0.71073 |             |
| Cell:           | a=21.441(4)    | b=5.2059(9)        | c=17.465(4) |
|                 | alpha=90       | beta=102.673(10)   | gamma=90    |
| Temperature:    | 296 K          |                    |             |

|                |                                             |             |
|----------------|---------------------------------------------|-------------|
|                | Calculated                                  | Reported    |
| Volume         | 1902.0(7)                                   | 1901.9(7)   |
| Space group    | P 21/c                                      | P 21/c      |
| Hall group     | -P 2ybc                                     | -P 2ybc     |
| Moiety formula | C14 H9 I2 N O3, C2 H6 O S C16 H15 I2 N O4 S | Sum formula |
|                | C16 H15 I2 N O4 S                           | 571.15      |
|                | C16 H15 I2 N O4 S Mr                        | 571.15      |
| Dx,g cm-3      | 1.995                                       | 1.995       |
| Z              | 4                                           | 4           |
| Mu (mm-1)      | 3.435                                       | 3.435       |
| F000           | 1088.0                                      | 1088.0      |
| F000'          | 1085.14                                     |             |
| h,k,lmax       | 27,6,22                                     | 27,6,22     |
| Nref           | 4153                                        | 4128        |
| Tmin,Tmax      | 0.443,0.618                                 | 0.945,0.985 |
| Tmin'          | 0.226                                       |             |

Correction method= # Reported T Limits: Tmin=0.945 Tmax=0.985 AbsCorr =  
MULTI-SCAN

Data completeness= 0.994                      Theta(max)= 27.000

R(reflections)= 0.0439( 2516)                      wR2(reflections)=  
0.1028( 4128)  
S = 1.008                      Npar= 186

---

The following ALERTS were generated. Each ALERT has the format

**test-name\_ALERT\_alert-type\_alert-level.**

Click on the hyperlinks for more details of the test.

---

#### Alert level C

PLAT244\_ALERT\_4\_C Low 'Solvent' Ueq as  
Compared to Neighbors of S1 Check PLAT910\_ALERT\_3\_C Missing # of FCF Reflection(s)  
Below Theta(Min). 6 Note  
PLAT911\_ALERT\_3\_C Missing FCF Refl Between Thmin & STh/L= 0.600  
16 Report

---

#### Alert level G

PLAT007\_ALERT\_5\_G Number of Unrefined Donor-H Atoms ..... 2 Report  
PLAT042\_ALERT\_1\_G Calc. and Reported Moiety Formula Strings Differ Please Check  
PLAT171\_ALERT\_4\_G The CIF-Embedded .res File Contains EADP Records 1 Report  
PLAT301\_ALERT\_3\_G Main Residue Disorder 1 ) 30%  
PLAT410\_ALERT\_2\_G Short Intra H...H Contact H4A ..H8 . 2.04 Ang.  
x,y,z = 1\_555 Check  
PLAT410\_ALERT\_2\_G Short Intra H...H Contact H8 ..H4B . 2.04 Ang.  
x,y,z = 1\_555 Check  
PLAT480\_ALERT\_4\_G Lon H...A H-Bond Reported H2 ..S1 . 2.95 Ang.  
PLAT480\_ALERT\_4\_G Lon H...A H-Bond Reported H6B ..O1 . 2.61 Ang.  
PLAT480\_ALERT\_4\_G Lon H...A H-Bond Reported H12 ..I2 . 3.19 Ang.  
PLAT480\_ALERT\_4\_G Lon H...A H-Bond Reported H14 ..S1 . 2.89 Ang.  
PLAT912\_ALERT\_4\_G Missing # of FCF Reflections Above STh/L= 0.600  
4 Note  
PLAT933\_ALERT\_2\_G Number of HKL-OMIT Records in Embedded .res File 4 Note  
PLAT941\_ALERT\_3\_G Average HKL Measurement Multiplicity ..... 2.7 Low  
PLAT967\_ALERT\_5\_G Note: Two-Theta Cutoff Value in Embedded .res .. 54.0 Degree  
PLAT978\_ALERT\_2\_G Number C-C Bonds with Positive Residual Density. 6 Info

---

0 ALERT level A = Most likely a serious problem - resolve or explain

0 ALERT level B = A potentially serious problem, consider carefully

3 **ALERT level C** = Check. Ensure it is not caused by an omission or oversight

15 **ALERT level G** = General information/check it is not something unexpected

|   |     |        |                                                              |
|---|-----|--------|--------------------------------------------------------------|
| 1 | ALE | type 1 | CIF construction/syntax error, inconsistent or missing data  |
|   | RT  |        |                                                              |
| 4 | ALE | type 2 | Indicator that the structure model may be wrong or deficient |
|   | RT  |        |                                                              |
| 4 | ALE | type 3 | Indicator that the structure quality may be low              |
|   | RT  |        |                                                              |
| 7 | ALE | type 4 | Improvement, methodology, query or suggestion                |
|   | RT  |        |                                                              |
| 2 | ALE | type 5 | Informative message, check                                   |
|   | RT  |        |                                                              |

---

---

It is advisable to attempt to resolve as many as possible of the alerts in all categories. Often the minor alerts point to easily fixed oversights, errors and omissions in your CIF or refinement strategy, so attention to these fine details can be worthwhile. In order to resolve some of the more serious problems it may be necessary to carry out additional measurements or structure refinements. However, the purpose of your study may justify the reported deviations and the more serious of these should normally be commented upon in the discussion or experimental section of a paper or in the "special\_details" fields of the CIF. checkCIF was carefully designed to identify outliers and unusual parameters, but every test has its limitations and alerts that are not important in a particular case may appear. Conversely, the absence of alerts does not guarantee there are no aspects of the results needing attention. It is up to the individual to critically assess their own results and, if necessary, seek expert advice.

### **Publication of your CIF in IUCr journals**

A basic structural check has been run on your CIF. These basic checks will be run on all CIFs submitted for publication in IUCr journals (*Acta Crystallographica*, *Journal of Applied Crystallography*, *Journal of Synchrotron Radiation*); however, if you intend to submit to *Acta Crystallographica Section C* or *E* or *IUCrData*, you should make sure that full publication checks are run on the final version of your CIF prior to submission.

### **Publication of your CIF in other journals**

Please refer to the *Notes for Authors* of the relevant journal for any special instructions relating to CIF submission.

# Datablock 4aba35diiodo - ellipsoid plot

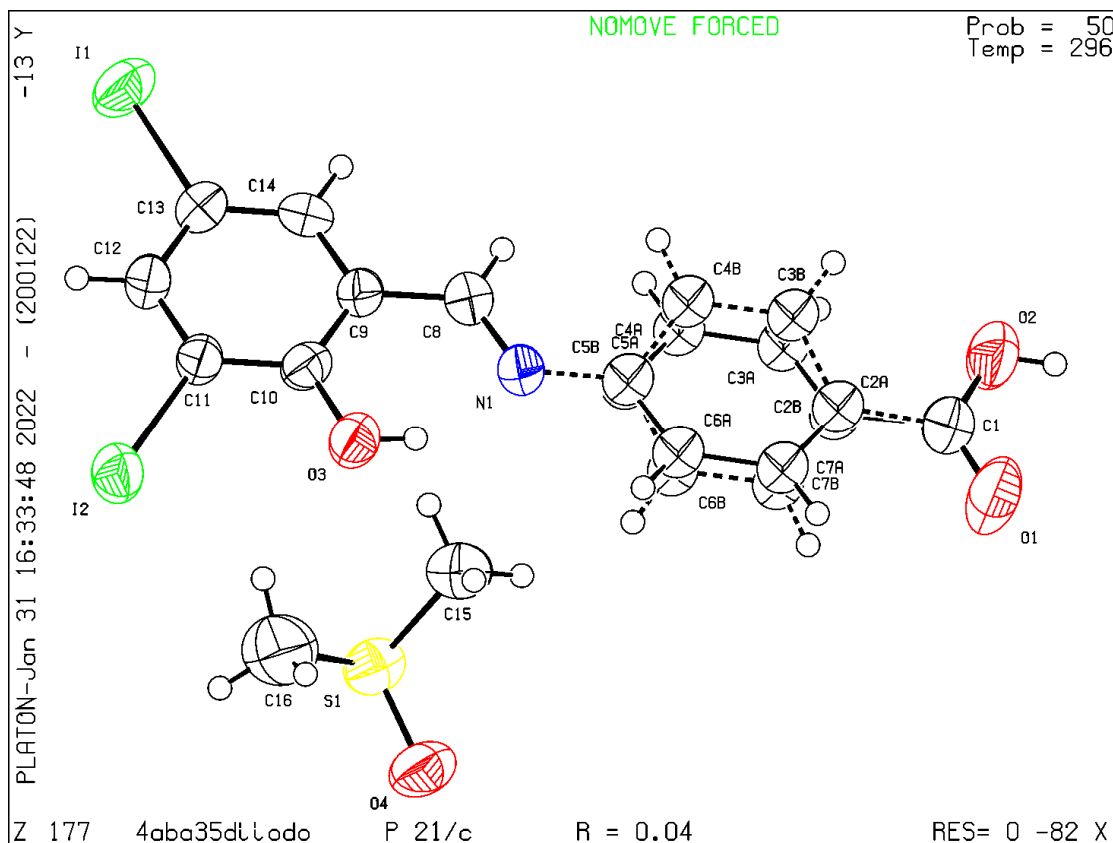

## CIF of HMBA without hkl data

data\_global

#=====

# PROCESSING SUMMARY (IUCr Office Use only)

\_publ\_contact\_author

;

Muhammad Nawaz Tahir

University of Sargodha

Department of Physics

Sargodha

Pakistan

;

\_publ\_contact\_author\_phone '0092 48 92 30 914'

\_publ\_contact\_author\_fax '0092 48 32 22 121'

\_publ\_contact\_author\_email 'dmntahir\_uos@yahoo.com'

\_publ\_requested\_journal "

\_journal\_date\_recd\_electronic ?

\_journal\_date\_to\_coeditor ?

\_journal\_date\_from\_coeditor ?

\_journal\_date\_accepted ?

\_journal\_date\_printers\_first ?

\_journal\_date\_printers\_final ?

\_journal\_date\_proofs\_out ?

\_journal\_date\_proofs\_in ?

\_journal\_coeditor\_name ?

\_journal\_coeditor\_code ?

\_journal\_paper\_category ?

\_journal\_coeditor\_notes

;

;

\_journal\_techeditor\_code     ?

\_iucr\_compatibility\_tag       ?

\_journal\_techeditor\_notes

;

;

\_journal\_coden\_ASTM           ?

\_journal\_name\_full            ?

\_journal\_year                 ?

\_journal\_volume               ?

\_journal\_issue                ?

\_journal\_page\_first           ?

\_journal\_page\_last            ?

\_journal\_suppl\_publ\_number    ?

\_journal\_suppl\_publ\_pages     ?

#=====

loop\_

\_publ\_author\_name

\_publ\_author\_address

'Muhammad Nawaz Tahir'

;

Department of Physics  
University of Sargodha  
Sargodha  
Pakistan  
;

'Muhammad Ashfaq'  
;

Department of Physics  
University of Sargodha  
Sargodha  
Pakistan  
;

'Akbar Ali'  
;  
Department of Chemistry,  
Government College University,  
Faisalabad,  
Pakistan  
;

'Muhammad Khalid'  
;  
Department of Chemistry,



Khwaja Fareed University of Engineering and Information Technology,

Rahim Yar Khan,64200,

Pakistan

;

\_audit\_creation\_date ?

\_audit\_creation\_method ?

#=====

# TEXT

\_publ\_section\_title

;

2-{(E)-[(4-carboxyphenyl)iminio]methyl}-6-methoxyphenolate methanol (1/1)

;

\_publ\_section\_abstract

;

;

\_publ\_section\_comment

;

;

\_publ\_section\_exptl\_refinement

;

;

\_publ\_section\_exptl\_prep

;

;

\_publ\_section\_related\_literature

;

;

\_publ\_section\_references

;

Bruker (2005). *SADABS*. Bruker AXS Inc., Madison, Wisconsin, USA.

Bruker (2007). *APEX2* and *SAINT*. Bruker AXS Inc.,  
Madison, Wisconsin, USA.

Farrugia, L. J. (1997). *J. Appl. Cryst.* **30**, 565.

Farrugia, L. J. (1999). *J. Appl. Cryst.* **32**, 837--838.

Sheldrick, G. M. (2008). *Acta Cryst.* A**64**, 112--122.

Sheldrick, G. M. (2015). *Acta Cryst.* C**71**, 3--8.

Spek, A. L. (2009). *Acta Cryst.* D**65**, 148--155.

;

\_publ\_section\_figure\_captions

;

;

\_publ\_section\_acknowledgements

;

;

data\_new4abovan\_0m

\_audit\_creation\_method 'SHELXL-2018/3'

\_shelx\_SHELXL\_version\_number '2018/3'

\_chemical\_name\_common ?

\_chemical\_absolute\_configuration ''

\_chemical\_name\_systematic

;

2-{(E)-[(4-carboxyphenyl)iminio]methyl}-6-methoxyphenolate methanol (1/1)

;

\_chemical\_formula\_moiety 'C15 H13 N O4, C H4 O'

\_chemical\_formula\_sum    'C16 H17 N O5'  
\_chemical\_formula\_iupac   'C16 H17 N O5'  
\_chemical\_formula\_weight        303.30

loop\_

\_atom\_type\_symbol  
\_atom\_type\_description  
\_atom\_type\_scatter\_dispersion\_real  
\_atom\_type\_scatter\_dispersion\_imag  
\_atom\_type\_scatter\_source  
'C' 'C' 0.0033 0.0016  
'International Tables Vol C Tables 4.2.6.8 and 6.1.1.4'  
'H' 'H' 0.0000 0.0000  
'International Tables Vol C Tables 4.2.6.8 and 6.1.1.4'  
'N' 'N' 0.0061 0.0033  
'International Tables Vol C Tables 4.2.6.8 and 6.1.1.4'  
'O' 'O' 0.0106 0.0060  
'International Tables Vol C Tables 4.2.6.8 and 6.1.1.4'

\_space\_group\_crystal\_system    orthorhombic  
\_space\_group\_IT\_number        19  
\_space\_group\_name\_H-M\_alt       'P 21 21 21'  
\_space\_group\_name\_Hall        'P 2ac 2ab'

\_shelx\_space\_group\_comment

;

The symmetry employed for this shelxl refinement is uniquely defined by the following loop, which should always be used as a source of symmetry information in preference to the above space-group names. They are only intended as comments.

;

loop\_

\_space\_group\_symop\_operation\_xyz

'x, y, z'

'x+1/2, -y+1/2, -z'

'-x, y+1/2, -z+1/2'

'-x+1/2, -y, z+1/2'

|                               |            |
|-------------------------------|------------|
| _cell_length_a                | 4.7768(11) |
| _cell_length_b                | 10.193(3)  |
| _cell_length_c                | 30.479(7)  |
| _cell_angle_alpha             | 90         |
| _cell_angle_beta              | 90         |
| _cell_angle_gamma             | 90         |
| _cell_volume                  | 1484.0(7)  |
| _cell_formula_units_Z         | 4          |
| _cell_measurement_reflns_used | 1418       |
| _cell_measurement_theta_min   | 2.673      |
| _cell_measurement_theta_max   | 26.000     |

\_cell\_measurement\_temperature 296(2)  
\_exptl\_crystal\_description needle  
\_exptl\_crystal\_colour 'light yellow'  
\_exptl\_crystal\_size\_max 0.40  
\_exptl\_crystal\_size\_mid 0.22  
\_exptl\_crystal\_size\_min 0.16  
\_exptl\_crystal\_density\_diffn 1.358  
\_exptl\_crystal\_density\_meas ?  
\_exptl\_crystal\_density\_method 'not measured'  
\_exptl\_crystal\_F\_000 640  
\_exptl\_absorpt\_coefficient\_mu 0.102  
\_exptl\_absorpt\_correction\_type multi-scan  
\_exptl\_absorpt\_process\_details '(SADABS; Bruker, 2005)'  
\_exptl\_absorpt\_correction\_T\_min 0.915  
\_exptl\_absorpt\_correction\_T\_max 0.975  
\_exptl\_special\_details  
;  
;

\_diffn\_ambient\_temperature 296(2)  
\_diffn\_radiation\_type MoK $\alpha$   
\_diffn\_radiation\_wavelength 0.71073  
\_diffn\_radiation\_source 'fine-focus sealed tube'  
\_diffn\_radiation\_monochromator graphite

\_diffraction\_measurement\_device\_type 'Bruker Kappa APEXII CCD'  
\_diffraction\_measurement\_method \w  
\_diffraction\_detector\_area\_resol\_mean 8.225  
\_diffraction\_reflections\_number 6629  
\_diffraction\_reflections\_av\_unetI/netI 0.1486  
\_diffraction\_reflections\_av\_R\_equivalents 0.0816  
\_diffraction\_reflections\_limit\_h\_min -5  
\_diffraction\_reflections\_limit\_h\_max 4  
\_diffraction\_reflections\_limit\_k\_min -10  
\_diffraction\_reflections\_limit\_k\_max 12  
\_diffraction\_reflections\_limit\_l\_min -32  
\_diffraction\_reflections\_limit\_l\_max 36  
\_diffraction\_reflections\_theta\_min 2.673  
\_diffraction\_reflections\_theta\_max 25.498  
\_diffraction\_reflections\_theta\_full 25.242  
\_diffraction\_measured\_fraction\_theta\_max 0.998  
\_diffraction\_measured\_fraction\_theta\_full 0.998  
\_diffraction\_reflections\_Laue\_measured\_fraction\_max 0.998  
\_diffraction\_reflections\_Laue\_measured\_fraction\_full 0.998  
\_diffraction\_reflections\_point\_group\_measured\_fraction\_max 0.995  
\_diffraction\_reflections\_point\_group\_measured\_fraction\_full 0.996  
\_reflections\_Friedel\_coverage 0.662  
\_reflections\_Friedel\_fraction\_max 0.991  
\_reflections\_Friedel\_fraction\_full 0.993  
\_diffraction\_standards\_number 0

\_diffn\_standards\_interval\_count ?

\_diffn\_standards\_interval\_time ?

\_diffn\_standards\_decay\_% ?

\_refine\_special\_details

;

Refinement of  $\langle F \rangle^2$  against ALL reflections. The weighted  $\langle R \rangle$ -factor

$\langle wR \rangle$  and goodness of fit  $\langle S \rangle$  are based on  $\langle F \rangle^2$ , conventional

$\langle R \rangle$ -factors  $\langle R \rangle$  are based on  $\langle F \rangle$ , with  $\langle F \rangle$  set to zero for

negative  $\langle F \rangle^2$ . The threshold expression of  $\langle F \rangle^2$

$\sqrt{\langle F \rangle^2}$  is used only for calculating  $\langle R \rangle$ -factors(gt) etc.

and is not relevant to the choice of reflections for refinement.

$\langle R \rangle$ -factors based on  $\langle F \rangle^2$  are statistically about twice as large

as those based on  $\langle F \rangle$ , and  $\langle R \rangle$ - factors based on ALL data will be

even larger.

;

\_reflns\_number\_total 2753

\_reflns\_number\_gt 1398

\_reflns\_threshold\_expression  $I > 2\sigma(I)$

\_refine\_ls\_structure\_factor\_coef Fsqd

\_refine\_ls\_matrix\_type full

\_refine\_ls\_R\_factor\_all 0.1881

\_refine\_ls\_R\_factor\_gt 0.0910

\_refine\_ls\_wR\_factor\_ref 0.1885

\_refine\_ls\_wR\_factor\_gt 0.1514



```

_refine_ls_goodness_of_fit_ref  1.087
_refine_ls_restrained_S_all     1.073
_refine_ls_number_reflns       2753
_refine_ls_number_parameters    196
_refine_ls_number_restraints    0
_refine_ls_hydrogen_treatment  mixed
_refine_ls_weighting_scheme     calc
_refine_ls_weighting_details
'w=1/[s^2^(Fo^2^)+(0.0439P)^2^+1.0211P] where P=(Fo^2^+2Fc^2^)/3'
_atom_sites_solution_hydrogens  geom
_atom_sites_solution_primary    direct
_atom_sites_solution_secondary  difmap
_refine_ls_extinction_method    ?
_refine_ls_extinction_coef      ?
_refine_ls_extinction_expression ?
_refine_ls_abs_structure_details
;
Flack x determined using 331 quotients [(I+)-(I-)]/[(I+)+(I-)]
(Parsons, Flack and Wagner, Acta Cryst. B69 (2013) 249-259).
;
_refine_ls_abs_structure_Flack  -0.1(10)
_refine_ls_shift/su_max        0.000
_refine_ls_shift/su_mean       0.000
_computing_data_collection     'APEX2 (Bruker, 2007)'
_computing_cell_refinement     'SAINT (Bruker, 2007)'

```

\_computing\_data\_reduction 'SAINT (Bruker, 2007)'  
\_computing\_structure\_solution 'SHELXS97 (Sheldrick, 2008)'  
\_computing\_structure\_refinement 'SHELXL-2018/3 (Sheldrick, 2015)'  
\_computing\_molecular\_graphics  
'ORTEP-3 for Windows (Farrugia, 1997) and PLATON (Spek, 2009)'  
\_computing\_publication\_material  
;  
WinGX (Farrugia, 1999) and PLATON (Spek, 2009)  
;

loop\_  
\_atom\_site\_label  
\_atom\_site\_type\_symbol  
\_atom\_site\_fract\_x  
\_atom\_site\_fract\_y  
\_atom\_site\_fract\_z  
\_atom\_site\_U\_iso\_or\_equiv  
\_atom\_site\_adp\_type  
\_atom\_site\_occupancy  
\_atom\_site\_site\_symmetry\_order  
\_atom\_site\_calc\_flag  
\_atom\_site\_refinement\_flags\_posn  
\_atom\_site\_refinement\_flags\_adp  
\_atom\_site\_refinement\_flags\_occupancy  
\_atom\_site\_disorder\_assembly

\_atom\_site\_disorder\_group

O1 O -0.0535(16) 0.5295(6) 0.3100(2) 0.070(2) Uani 1 1 d . . . . .  
O2 O -0.0383(13) 0.3134(6) 0.3110(2) 0.0505(18) Uani 1 1 d . . . . .  
H2 H -0.13(2) 0.323(10) 0.336(3) 0.076 Uiso 1 1 d . U . . .  
O3 O 1.0377(11) 0.5583(5) 0.09438(18) 0.0413(16) Uani 1 1 d . U . . .  
O4 O 1.4042(11) 0.5791(7) 0.03068(19) 0.0529(18) Uani 1 1 d . U . . .  
N1 N 0.7724(14) 0.4142(7) 0.1492(2) 0.0331(17) Uani 1 1 d . . . . .  
H1 H 0.823(16) 0.497(8) 0.137(2) 0.040 Uiso 1 1 d . U . . .  
C1 C 0.0227(17) 0.4279(9) 0.2938(3) 0.038(2) Uani 1 1 d . . . . .  
C2 C 0.1983(9) 0.4190(6) 0.25330(13) 0.032(2) Uani 1 1 d G U . . .  
C3 C 0.3135(11) 0.3000(4) 0.24024(16) 0.038(2) Uani 1 1 d G U . . .  
H3 H 0.266502 0.223203 0.254998 0.045 Uiso 1 1 calc R U . . .  
C4 C 0.4990(11) 0.2957(4) 0.20513(17) 0.041(2) Uani 1 1 d G U . . .  
H4 H 0.576100 0.216116 0.196398 0.049 Uiso 1 1 calc R U . . .  
C5 C 0.5693(10) 0.4105(5) 0.18308(14) 0.031(2) Uani 1 1 d G U . . .  
C6 C 0.4541(11) 0.5294(4) 0.19614(16) 0.042(2) Uani 1 1 d G U . . .  
H6 H 0.501094 0.606214 0.181387 0.050 Uiso 1 1 calc R U . . .  
C7 C 0.2686(11) 0.5337(4) 0.23125(17) 0.045(3) Uani 1 1 d G U . . .  
H7 H 0.191494 0.613303 0.239987 0.054 Uiso 1 1 calc R U . . .  
C8 C 0.9209(17) 0.3168(9) 0.1366(3) 0.035(2) Uani 1 1 d . . . . .  
H8 H 0.894731 0.235487 0.149823 0.042 Uiso 1 1 calc R U . . .  
C9 C 1.1265(16) 0.3296(8) 0.1027(3) 0.033(2) Uani 1 1 d D U . . .  
C10 C 1.1721(16) 0.4517(8) 0.0828(3) 0.036(2) Uani 1 1 d D U . . .  
C11 C 1.3757(17) 0.4583(9) 0.0487(3) 0.041(2) Uani 1 1 d D U . . .  
C12 C 1.5243(17) 0.3477(8) 0.0369(3) 0.044(2) Uani 1 1 d D U . . .

H12 H 1.659643 0.353762 0.015099 0.053 Uiso 1 1 calc R U . . .  
 C13 C 1.4760(17) 0.2269(9) 0.0571(3) 0.045(2) Uani 1 1 d D U . . .  
 H13 H 1.576253 0.152965 0.048521 0.054 Uiso 1 1 calc R U . . .  
 C14 C 1.2779(17) 0.2184(8) 0.0898(3) 0.043(2) Uani 1 1 d D U . . .  
 H14 H 1.244579 0.138317 0.103512 0.051 Uiso 1 1 calc R U . . .  
 C15 C 1.614(2) 0.5955(11) -0.0031(3) 0.068(3) Uani 1 1 d . . . . .  
 H15A H 1.796071 0.577137 0.008912 0.102 Uiso 1 1 calc R U . . .  
 H15B H 1.609829 0.684097 -0.013762 0.102 Uiso 1 1 calc R U . . .  
 H15C H 1.576840 0.536140 -0.026823 0.102 Uiso 1 1 calc R U . . .  
 O5 O 0.2699(14) 0.8018(8) 0.1109(3) 0.067(2) Uani 1 1 d . . . . .  
 H5A H 0.235257 0.727970 0.101734 0.101 Uiso 1 1 calc R U . . .  
 C16 C 0.548(2) 0.8372(10) 0.0990(3) 0.067(3) Uani 1 1 d . . . . .  
 H16A H 0.593617 0.920578 0.111731 0.100 Uiso 1 1 calc R U . . .  
 H16B H 0.561381 0.842970 0.067613 0.100 Uiso 1 1 calc R U . . .  
 H16C H 0.675922 0.771833 0.109534 0.100 Uiso 1 1 calc R U . . .

loop\_

\_atom\_site\_aniso\_label

\_atom\_site\_aniso\_U\_11

\_atom\_site\_aniso\_U\_22

\_atom\_site\_aniso\_U\_33

\_atom\_site\_aniso\_U\_23

\_atom\_site\_aniso\_U\_13

\_atom\_site\_aniso\_U\_12

O1 0.100(6) 0.037(4) 0.074(5) 0.003(4) 0.049(5) 0.008(4)

O2 0.061(5) 0.042(4) 0.049(4) -0.007(3) 0.020(3) -0.005(4)  
O3 0.035(4) 0.037(4) 0.051(4) 0.003(3) 0.012(3) 0.005(3)  
O4 0.045(4) 0.063(5) 0.050(4) 0.009(4) 0.020(3) 0.003(4)  
N1 0.032(4) 0.025(4) 0.042(4) 0.008(4) 0.005(3) -0.009(4)  
C1 0.033(5) 0.035(6) 0.047(6) 0.005(5) 0.007(4) 0.005(5)  
C2 0.033(5) 0.036(5) 0.027(5) 0.005(4) -0.001(4) -0.010(4)  
C3 0.042(6) 0.020(5) 0.051(6) 0.007(4) 0.019(5) -0.008(4)  
C4 0.047(6) 0.018(5) 0.057(6) 0.000(4) 0.018(5) 0.008(4)  
C5 0.020(5) 0.037(5) 0.035(5) 0.001(4) 0.002(4) -0.007(4)  
C6 0.043(6) 0.037(6) 0.044(6) 0.009(4) 0.008(5) -0.007(5)  
C7 0.042(6) 0.044(6) 0.048(6) 0.000(5) 0.010(5) 0.007(5)  
C8 0.028(5) 0.029(5) 0.047(6) 0.005(4) -0.004(4) -0.008(4)  
C9 0.018(4) 0.048(6) 0.033(5) 0.000(4) -0.002(4) -0.008(4)  
C10 0.023(5) 0.050(7) 0.035(5) 0.004(5) 0.000(4) -0.007(4)  
C11 0.033(5) 0.053(7) 0.037(6) 0.006(5) 0.001(4) -0.004(5)  
C12 0.025(5) 0.062(7) 0.046(6) -0.002(5) 0.004(4) -0.009(5)  
C13 0.029(5) 0.054(7) 0.051(6) -0.010(5) 0.003(5) 0.003(5)  
C14 0.036(6) 0.047(6) 0.045(6) -0.003(5) -0.007(5) -0.008(5)  
C15 0.053(7) 0.098(10) 0.053(7) 0.020(7) 0.022(6) 0.005(7)  
O5 0.067(5) 0.073(6) 0.062(5) -0.015(4) 0.026(4) -0.015(4)  
C16 0.041(7) 0.078(8) 0.081(8) -0.001(7) -0.006(6) -0.005(6)

\_geom\_special\_details

;

All esds (except the esd in the dihedral angle between two l.s. planes)

are estimated using the full covariance matrix. The cell esds are taken into account individually in the estimation of esds in distances, angles and torsion angles; correlations between esds in cell parameters are only used when they are defined by crystal symmetry. An approximate (isotropic) treatment of cell esds is used for estimating esds involving l.s. planes.

;

loop\_

\_geom\_bond\_atom\_site\_label\_1

\_geom\_bond\_atom\_site\_label\_2

\_geom\_bond\_distance

\_geom\_bond\_site\_symmetry\_2

\_geom\_bond\_publ\_flag

O1 C1 1.203(10) . ?

O2 C1 1.312(10) . ?

O2 H2 0.89(9) . ?

O3 C10 1.310(9) . ?

O4 C11 1.355(9) . ?

O4 C15 1.448(9) . ?

N1 C8 1.279(10) . ?

N1 C5 1.418(7) . ?

N1 H1 0.95(8) . ?

C1 C2 1.495(9) . ?

C2 C3 1.3900 . ?

C2 C7 1.3900 . ?

C3 C4 1.3900 . ?  
C3 H3 0.9300 . ?  
C4 C5 1.3900 . ?  
C4 H4 0.9300 . ?  
C5 C6 1.3900 . ?  
C6 C7 1.3900 . ?  
C6 H6 0.9300 . ?  
C7 H7 0.9300 . ?  
C8 C9 1.432(10) . ?  
C8 H8 0.9300 . ?  
C9 C10 1.400(8) . ?  
C9 C14 1.400(9) . ?  
C10 C11 1.426(9) . ?  
C11 C12 1.379(9) . ?  
C12 C13 1.395(9) . ?  
C12 H12 0.9300 . ?  
C13 C14 1.378(8) . ?  
C13 H13 0.9300 . ?  
C14 H14 0.9300 . ?  
C15 H15A 0.9600 . ?  
C15 H15B 0.9600 . ?  
C15 H15C 0.9600 . ?  
O5 C16 1.423(10) . ?  
O5 H5A 0.8200 . ?  
C16 H16A 0.9600 . ?

C16 H16B 0.9600 . ?

C16 H16C 0.9600 . ?

loop\_

\_geom\_angle\_atom\_site\_label\_1

\_geom\_angle\_atom\_site\_label\_2

\_geom\_angle\_atom\_site\_label\_3

\_geom\_angle

\_geom\_angle\_site\_symmetry\_1

\_geom\_angle\_site\_symmetry\_3

\_geom\_angle\_publ\_flag

C1 O2 H2 111(7) . . ?

C11 O4 C15 117.5(7) . . ?

C8 N1 C5 125.3(7) . . ?

C8 N1 H1 116(5) . . ?

C5 N1 H1 119(5) . . ?

O1 C1 O2 122.3(8) . . ?

O1 C1 C2 124.2(8) . . ?

O2 C1 C2 113.5(8) . . ?

C3 C2 C7 120.0 . . ?

C3 C2 C1 120.8(5) . . ?

C7 C2 C1 118.9(5) . . ?

C2 C3 C4 120.0 . . ?

C2 C3 H3 120.0 . . ?

C4 C3 H3 120.0 . . ?



C5 C4 C3 120.0 . . ?  
C5 C4 H4 120.0 . . ?  
C3 C4 H4 120.0 . . ?  
C4 C5 C6 120.0 . . ?  
C4 C5 N1 122.7(5) . . ?  
C6 C5 N1 117.1(5) . . ?  
C7 C6 C5 120.0 . . ?  
C7 C6 H6 120.0 . . ?  
C5 C6 H6 120.0 . . ?  
C6 C7 C2 120.0 . . ?  
C6 C7 H7 120.0 . . ?  
C2 C7 H7 120.0 . . ?  
N1 C8 C9 121.7(8) . . ?  
N1 C8 H8 119.1 . . ?  
C9 C8 H8 119.1 . . ?  
C10 C9 C14 121.3(7) . . ?  
C10 C9 C8 120.0(7) . . ?  
C14 C9 C8 118.8(7) . . ?  
O3 C10 C9 123.0(7) . . ?  
O3 C10 C11 119.4(8) . . ?  
C9 C10 C11 117.6(8) . . ?  
O4 C11 C12 125.9(7) . . ?  
O4 C11 C10 114.0(8) . . ?  
C12 C11 C10 120.1(8) . . ?  
C11 C12 C13 121.5(8) . . ?

C11 C12 H12 119.3 . . ?  
C13 C12 H12 119.3 . . ?  
C14 C13 C12 119.2(8) . . ?  
C14 C13 H13 120.4 . . ?  
C12 C13 H13 120.4 . . ?  
C13 C14 C9 120.4(8) . . ?  
C13 C14 H14 119.8 . . ?  
C9 C14 H14 119.8 . . ?  
O4 C15 H15A 109.5 . . ?  
O4 C15 H15B 109.5 . . ?  
H15A C15 H15B 109.5 . . ?  
O4 C15 H15C 109.5 . . ?  
H15A C15 H15C 109.5 . . ?  
H15B C15 H15C 109.5 . . ?  
C16 O5 H5A 109.5 . . ?  
O5 C16 H16A 109.5 . . ?  
O5 C16 H16B 109.5 . . ?  
H16A C16 H16B 109.5 . . ?  
O5 C16 H16C 109.5 . . ?  
H16A C16 H16C 109.5 . . ?  
H16B C16 H16C 109.5 . . ?

loop\_

\_geom\_torsion\_atom\_site\_label\_1

\_geom\_torsion\_atom\_site\_label\_2

\_geom\_torsion\_atom\_site\_label\_3

\_geom\_torsion\_atom\_site\_label\_4

\_geom\_torsion

\_geom\_torsion\_site\_symmetry\_1

\_geom\_torsion\_site\_symmetry\_2

\_geom\_torsion\_site\_symmetry\_3

\_geom\_torsion\_site\_symmetry\_4

\_geom\_torsion\_publ\_flag

O1 C1 C2 C3 170.1(8) . . . . ?

O2 C1 C2 C3 -8.6(9) . . . . ?

O1 C1 C2 C7 -3.4(11) . . . . ?

O2 C1 C2 C7 177.8(5) . . . . ?

C7 C2 C3 C4 0.0 . . . . ?

C1 C2 C3 C4 -173.5(6) . . . . ?

C2 C3 C4 C5 0.0 . . . . ?

C3 C4 C5 C6 0.0 . . . . ?

C3 C4 C5 N1 175.2(5) . . . . ?

C8 N1 C5 C4 -3.5(9) . . . . ?

C8 N1 C5 C6 171.9(6) . . . . ?

C4 C5 C6 C7 0.0 . . . . ?

N1 C5 C6 C7 -175.5(5) . . . . ?

C5 C6 C7 C2 0.0 . . . . ?

C3 C2 C7 C6 0.0 . . . . ?

C1 C2 C7 C6 173.6(6) . . . . ?

C5 N1 C8 C9 -178.6(6) . . . . ?

N1 C8 C9 C10 1.0(11) . . . . ?  
N1 C8 C9 C14 -178.7(8) . . . . ?  
C14 C9 C10 O3 -178.9(7) . . . . ?  
C8 C9 C10 O3 1.4(12) . . . . ?  
C14 C9 C10 C11 0.8(12) . . . . ?  
C8 C9 C10 C11 -178.9(7) . . . . ?  
C15 O4 C11 C12 -1.8(12) . . . . ?  
C15 O4 C11 C10 177.7(7) . . . . ?  
O3 C10 C11 O4 -1.3(11) . . . . ?  
C9 C10 C11 O4 179.0(7) . . . . ?  
O3 C10 C11 C12 178.3(7) . . . . ?  
C9 C10 C11 C12 -1.5(12) . . . . ?  
O4 C11 C12 C13 -179.0(8) . . . . ?  
C10 C11 C12 C13 1.5(13) . . . . ?  
C11 C12 C13 C14 -0.8(13) . . . . ?  
C12 C13 C14 C9 0.1(12) . . . . ?  
C10 C9 C14 C13 -0.2(12) . . . . ?  
C8 C9 C14 C13 179.5(7) . . . . ?

loop\_

\_geom\_hbond\_atom\_site\_label\_D  
\_geom\_hbond\_atom\_site\_label\_H  
\_geom\_hbond\_atom\_site\_label\_A  
\_geom\_hbond\_distance\_DH  
\_geom\_hbond\_distance\_HA

\_geom\_hbond\_distance\_DA

\_geom\_hbond\_angle\_DHA

\_geom\_hbond\_site\_symmetry\_A

\_geom\_hbond\_publ\_flag

O2 H2 O5 0.89(9) 1.76(9) 2.628(9) 164(10) 3\_545 yes

N1 H1 O3 0.95(8) 1.77(8) 2.560(8) 138(7) . yes

C8 H8 O1 0.93 2.55 3.410(11) 154.6 3\_645 yes

O5 H5A O3 0.82 1.98 2.765(9) 159.3 1\_455 yes

\_refine\_diff\_density\_max 0.267

\_refine\_diff\_density\_min -0.256

\_refine\_diff\_density\_rms 0.059

\_shelx\_res\_file

;

TITL NEW4ABOVAN\_0m in P2(1)2(1)2(1) LIGHT YELLOW NEEDLE

shelx.res

created by SHELXL-2018/3 at 12:29:19 on 29-Sep-2021

CELL 0.71073 4.7768 10.1926 30.4787 90.000 90.000 90.000

ZERR 4.00 0.0011 0.0028 0.0074 0.000 0.000 0.000

LATT -1

SYMM x+1/2, -y+1/2, -z

SYMM -x, y+1/2, -z+1/2

SYMM -x+1/2, -y, z+1/2

SFAC C H N O

UNIT 64 68 4 20

OMIT -3 51

L.S. 40

ACTA

BOND \$H

HTAB

CONF

LIST 4

FMAP 2

PLAN 12

TEMP 23.000

OMIT 0 0 2

OMIT 0 1 1

SIZE 0.40 0.22 0.16

DFIX 1.39 0.01 C9 C10 C10 C11 C11 C12 C12 C13 C13 C14 C14 C9

MPLA 3 C1 O1 O2

MPLA 7 C2 C3 C4 C5 C6 C7 N1

MPLA 10 C8 C9 C10 C11 C12 C13 C14 C15 O3 O4

MPLA 3 C1 O1 O2

SIMU C2 C3 C4 C5 C6 C7 C8

SIMU C9 C10 C11 C12 C13 C14 O3 O4

EQIV \$1 -x, y-1/2, -z+1/2

HTAB O2 O5\_\$1

HTAB N1 O3

EQIV \$2 -x+1, y-1/2, -z+1/2

HTAB C8 O1\_\$2

EQIV \$3 x-1, y, z

HTAB O5 O3\_\$3

WGHT 0.043900 1.021100

FVAR 0.18742

MOLE 1

O1 4 -0.053492 0.529468 0.310009 11.00000 0.10026 0.03680 =  
0.07438 0.00324 0.04915 0.00824

O2 4 -0.038293 0.313379 0.310956 11.00000 0.06051 0.04236 =  
0.04877 -0.00722 0.01965 -0.00450

H2 2 -0.133385 0.322887 0.335996 11.00000 -1.50000

O3 4 1.037662 0.558311 0.094376 11.00000 0.03509 0.03743 =  
0.05137 0.00305 0.01154 0.00498

O4 4 1.404247 0.579139 0.030683 11.00000 0.04487 0.06329 =  
0.05043 0.00895 0.02032 0.00334

N1 3 0.772379 0.414172 0.149184 11.00000 0.03183 0.02541 =  
0.04220 0.00798 0.00497 -0.00907

H1 2 0.823056 0.496929 0.137213 11.00000 -1.20000

C1 1 0.022713 0.427938 0.293782 11.00000 0.03265 0.03511 =  
0.04696 0.00485 0.00736 0.00514

AFIX 66

C2 1 0.198303 0.418954 0.253303 11.00000 0.03297 0.03629 =  
0.02707 0.00503 -0.00107 -0.01034

C3 1 0.313520 0.299970 0.240244 11.00000 0.04200 0.02044 =  
0.05072 0.00672 0.01911 -0.00842

AFIX 43

H3 2 0.266502 0.223203 0.254998 11.00000 -1.20000

AFIX 65

C4 1 0.499013 0.295724 0.205135 11.00000 0.04747 0.01794 =  
0.05719 -0.00016 0.01815 0.00813

AFIX 43

H4 2 0.576100 0.216116 0.196398 11.00000 -1.20000

AFIX 65

C5 1 0.569289 0.410462 0.183083 11.00000 0.02000 0.03678 =  
0.03492 0.00054 0.00171 -0.00706

C6 1 0.454074 0.529447 0.196141 11.00000 0.04333 0.03749 =  
0.04378 0.00934 0.00750 -0.00663

AFIX 43

H6 2 0.501094 0.606214 0.181387 11.00000 -1.20000

AFIX 65

C7 1 0.268581 0.533694 0.231251 11.00000 0.04231 0.04412 =  
0.04835 -0.00012 0.01016 0.00712

AFIX 43

H7 2 0.191494 0.613303 0.239987 11.00000 -1.20000

AFIX 0

C8 1 0.920923 0.316787 0.136594 11.00000 0.02801 0.02883 =  
0.04749 0.00471 -0.00379 -0.00826

AFIX 43

H8 2 0.894731 0.235487 0.149823 11.00000 -1.20000

AFIX 0



C9 1 1.126534 0.329634 0.102660 11.00000 0.01817 0.04798 =  
0.03311 0.00043 -0.00245 -0.00762

C10 1 1.172074 0.451714 0.082824 11.00000 0.02292 0.05023 =  
0.03478 0.00414 -0.00028 -0.00722

C11 1 1.375710 0.458284 0.048678 11.00000 0.03339 0.05260 =  
0.03747 0.00641 0.00080 -0.00410

C12 1 1.524277 0.347674 0.036935 11.00000 0.02513 0.06232 =  
0.04560 -0.00212 0.00374 -0.00874

AFIX 43

H12 2 1.659643 0.353762 0.015099 11.00000 -1.20000

AFIX 0

C13 1 1.475994 0.226866 0.057087 11.00000 0.02889 0.05420 =  
0.05112 -0.00980 0.00343 0.00257

AFIX 43

H13 2 1.576253 0.152965 0.048521 11.00000 -1.20000

AFIX 0

C14 1 1.277911 0.218381 0.089842 11.00000 0.03605 0.04723 =  
0.04543 -0.00311 -0.00658 -0.00848

AFIX 43

H14 2 1.244579 0.138317 0.103512 11.00000 -1.20000

AFIX 0

C15 1 1.614449 0.595506 -0.003092 11.00000 0.05294 0.09777 =  
0.05319 0.01997 0.02208 0.00515

AFIX 137

H15A 2 1.796071 0.577137 0.008912 11.00000 -1.50000

H15B 2 1.609829 0.684097 -0.013762 11.00000 -1.50000

H15C 2 1.576840 0.536140 -0.026823 11.00000 -1.50000

AFIX 0

O5 4 0.269888 0.801822 0.110921 11.00000 0.06654 0.07344 =  
0.06184 -0.01518 0.02568 -0.01497

AFIX 147

H5A 2 0.235257 0.727970 0.101734 11.00000 -1.50000

AFIX 0

C16 1 0.547807 0.837177 0.098978 11.00000 0.04146 0.07838 =  
0.08055 -0.00145 -0.00639 -0.00504

AFIX 137

H16A 2 0.593617 0.920578 0.111731 11.00000 -1.50000

H16B 2 0.561381 0.842970 0.067613 11.00000 -1.50000

H16C 2 0.675922 0.771833 0.109534 11.00000 -1.50000

AFIX 0

HKLF 4 1 1 0 0 0 1 0 0 0 1

REM NEW4ABOVAN\_0m in P2(1)2(1)2(1) LIGHT YELLOW NEEDLE

REM wR2 = 0.1885, GooF = S = 1.087, Restrained GooF = 1.073 for all data

REM R1 = 0.0910 for 1398 Fo > 4sig(Fo) and 0.1881 for all 2753 data

REM 196 parameters refined using 90 restraints

END

WGHT 0.0439 1.0229

REM Instructions for potential hydrogen bonds

HTAB O2 O5\_\$1

HTAB N1 O3

HTAB C8 O1\_\$2

HTAB O5 O3\_\$3

REM Highest difference peak 0.267, deepest hole -0.256, 1-sigma level 0.059

|     |   |        |        |        |          |      |      |
|-----|---|--------|--------|--------|----------|------|------|
| Q1  | 1 | 0.4263 | 0.4836 | 0.1853 | 11.00000 | 0.05 | 0.27 |
| Q2  | 1 | 1.0881 | 0.6430 | 0.0906 | 11.00000 | 0.05 | 0.26 |
| Q3  | 1 | 1.0095 | 0.6451 | 0.0907 | 11.00000 | 0.05 | 0.25 |
| Q4  | 1 | 0.2739 | 0.5382 | 0.2089 | 11.00000 | 0.05 | 0.24 |
| Q5  | 1 | 0.3754 | 0.3557 | 0.1985 | 11.00000 | 0.05 | 0.22 |
| Q6  | 1 | 1.0265 | 0.3831 | 0.0895 | 11.00000 | 0.05 | 0.21 |
| Q7  | 1 | 1.2817 | 0.3873 | 0.0917 | 11.00000 | 0.05 | 0.21 |
| Q8  | 1 | 0.0614 | 0.5979 | 0.3050 | 11.00000 | 0.05 | 0.21 |
| Q9  | 1 | 0.3387 | 0.6952 | 0.0875 | 11.00000 | 0.05 | 0.20 |
| Q10 | 1 | 0.5567 | 0.3944 | 0.2009 | 11.00000 | 0.05 | 0.20 |
| Q11 | 1 | 0.3496 | 0.3861 | 0.2546 | 11.00000 | 0.05 | 0.20 |
| Q12 | 1 | 0.6706 | 0.4807 | 0.1863 | 11.00000 | 0.05 | 0.19 |

;

## CIF of DHBA without hkl data

data\_global

#=====

# PROCESSING SUMMARY (IUCr Office Use only)

\_publ\_contact\_author

;

Muhammad Nawaz Tahir

University of Sargodha

Department of Physics

Sargodha

Pakistan

;

\_publ\_contact\_author\_phone '0092 48 92 30 914'

\_publ\_contact\_author\_fax '0092 48 32 22 121'

\_publ\_contact\_author\_email 'dmntahir\_uos@yahoo.com'

\_publ\_requested\_journal "

\_journal\_date\_recd\_electronic ?

\_journal\_date\_to\_coeditor ?

\_journal\_date\_from\_coeditor ?

\_journal\_date\_accepted ?

\_journal\_date\_printers\_first ?

\_journal\_date\_printers\_final ?

\_journal\_date\_proofs\_out ?

\_journal\_date\_proofs\_in ?

\_journal\_coeditor\_name ?

\_journal\_coeditor\_code ?

\_journal\_paper\_category ?

\_journal\_coeditor\_notes

;

;

\_journal\_techeditor\_code ?

\_iucr\_compatibility\_tag ?

\_journal\_techeditor\_notes

;

;

\_journal\_coden\_ASTM ?

\_journal\_name\_full ?

\_journal\_year ?

\_journal\_volume ?

\_journal\_issue ?

\_journal\_page\_first ?

\_journal\_page\_last ?

\_journal\_suppl\_publ\_number ?

\_journal\_suppl\_publ\_pages ?

#=====

loop\_

\_publ\_author\_name

\_publ\_author\_address

'Muhammad Nawaz Tahir'

;

Department of Physics

University of Sargodha

Sargodha

Pakistan

;

'Muhammad Ashfaq'

;

Department of Physics

University of Sargodha

Sargodha

Pakistan

;

'Akbar Ali'

;

Department of Chemistry,  
Government College University,  
Faisalabad,  
Pakistan

;

'Muhammad Khalid'

;

Department of Chemistry,  
Khwaja Fareed University of Engineering and Information Technology,  
Rahim Yar Khan,64200,  
Pakistan

;

\_audit\_creation\_date           ?

\_audit\_creation\_method       ?

#=====

=====

# TEXT

\_publ\_section\_title

;

(E)-4-((2-hydroxy-3,5-diiodobenzylidene)amino)benzoic acid (methylsulfinyl)

methane solvate (1:1)

;

\_publ\_section\_abstract

;

;

\_publ\_section\_comment

;

;

\_publ\_section\_exptl\_refinement

;

;

\_publ\_section\_exptl\_prep

;

;

\_publ\_section\_related\_literature

;

;

\_publ\_section\_references

;



Bruker (2005). *SADABS*. Bruker AXS Inc., Madison, Wisconsin, USA.

Bruker (2007). *APEX2* and *SAINT*. Bruker AXS Inc., Madison, Wisconsin, USA.

Farrugia, L. J. (1997). *J. Appl. Cryst.* **30**, 565.

Farrugia, L. J. (1999). *J. Appl. Cryst.* **32**, 837--838.

Sheldrick, G. M. (2008). *Acta Cryst.* A **64**, 112--122.

Sheldrick, G. M. (2015). *Acta Cryst.* C **71**, 3--8.

Spek, A. L. (2009). *Acta Cryst.* D **65**, 148--155.

;

\_publ\_section\_figure\_captions

;

;

\_publ\_section\_acknowledgements

;

;

data\_4aba35diiodo

\_audit\_creation\_method 'SHELXL-2018/3'

\_shelx\_SHELXL\_version\_number '2018/3'

\_chemical\_name\_common ?

\_chemical\_absolute\_configuration '.'

\_chemical\_name\_systematic

;

(E)-4-((2-hydroxy-3,5-diiodobenzylidene)amino)benzoic acid (methylsulfinyl)

methane solvate (1:1)

;

\_chemical\_formula\_moiety 'C16 H15 I2 N O4 S'

\_chemical\_formula\_sum 'C16 H15 I2 N O4 S'

\_chemical\_formula\_iupac 'C16 H15 I2 N O4 S'

\_chemical\_formula\_weight 571.15

loop\_

\_atom\_type\_symbol

\_atom\_type\_description

\_atom\_type\_scatter\_dispersion\_real

\_atom\_type\_scatter\_dispersion\_imag

\_atom\_type\_scatter\_source

'C' 'C' 0.0033 0.0016

'International Tables Vol C Tables 4.2.6.8 and 6.1.1.4'

'H' 'H' 0.0000 0.0000

'International Tables Vol C Tables 4.2.6.8 and 6.1.1.4'

'N' 'N' 0.0061 0.0033

'International Tables Vol C Tables 4.2.6.8 and 6.1.1.4'

'O' 'O' 0.0106 0.0060

'International Tables Vol C Tables 4.2.6.8 and 6.1.1.4'

'S' 'S' 0.1246 0.1234

'International Tables Vol C Tables 4.2.6.8 and 6.1.1.4'

'T' 'T' -0.4742 1.8119

'International Tables Vol C Tables 4.2.6.8 and 6.1.1.4'

\_space\_group\_crystal\_system monoclinic

\_space\_group\_IT\_number 14

\_space\_group\_name\_H-M\_alt 'P 21/c'

\_space\_group\_name\_Hall '-P 2ybc'

\_shelx\_space\_group\_comment

;

The symmetry employed for this shelxl refinement is uniquely defined by the following loop, which should always be used as a source of symmetry information in preference to the above space-group names.

They are only intended as comments.

;

loop\_

\_space\_group\_symop\_operation\_xyz

'x, y, z'

'-x, y+1/2, -z+1/2'

'-x, -y, -z'

'x, -y-1/2, z-1/2'

|                               |                |
|-------------------------------|----------------|
| _cell_length_a                | 21.441(4)      |
| _cell_length_b                | 5.2059(9)      |
| _cell_length_c                | 17.465(4)      |
| _cell_angle_alpha             | 90             |
| _cell_angle_beta              | 102.673(10)    |
| _cell_angle_gamma             | 90             |
| _cell_volume                  | 1901.9(7)      |
| _cell_formula_units_Z         | 4              |
| _cell_measurement_reflns_used | 2516           |
| _cell_measurement_theta_min   | 2.921          |
| _cell_measurement_theta_max   | 27.000         |
| _cell_measurement_temperature | 296(2)         |
| _exptl_crystal_description    | needle         |
| _exptl_crystal_colour         | 'orange'       |
| _exptl_crystal_size_max       | 0.43           |
| _exptl_crystal_size_mid       | 0.20           |
| _exptl_crystal_size_min       | 0.14           |
| _exptl_crystal_density_diffn  | 1.995          |
| _exptl_crystal_density_meas   | ?              |
| _exptl_crystal_density_method | 'not measured' |
| _exptl_crystal_F_000          | 1088           |

\_exptl\_absorpt\_coefficient\_mu 3.435  
\_exptl\_absorpt\_correction\_type multi-scan  
\_exptl\_absorpt\_process\_details '(SADABS; Bruker, 2005)'  
\_exptl\_absorpt\_correction\_T\_min 0.945  
\_exptl\_absorpt\_correction\_T\_max 0.985  
\_exptl\_special\_details  
;  
;

\_diffn\_ambient\_temperature 296(2)  
\_diffn\_radiation\_type MoK $\alpha$   
\_diffn\_radiation\_wavelength 0.71073  
\_diffn\_radiation\_source 'fine-focus sealed tube'  
\_diffn\_radiation\_monochromator graphite  
\_diffn\_measurement\_device\_type 'Bruker Kappa APEXII CCD'  
\_diffn\_measurement\_method \w  
\_diffn\_detector\_area\_resol\_mean 7.83  
\_diffn\_reflns\_number 11274  
\_diffn\_reflns\_av\_unetI/netI 0.0652  
\_diffn\_reflns\_av\_R\_equivalents 0.0492  
\_diffn\_reflns\_limit\_h\_min -25  
\_diffn\_reflns\_limit\_h\_max 27  
\_diffn\_reflns\_limit\_k\_min -6  
\_diffn\_reflns\_limit\_k\_max 6

```

_diffrn_reflms_limit_l_min      -16
_diffrn_reflms_limit_l_max      22
_diffrn_reflms_theta_min        2.921
_diffrn_reflms_theta_max        27.000
_diffrn_reflms_theta_full       25.242
_diffrn_measured_fraction_theta_max 0.994
_diffrn_measured_fraction_theta_full 0.994
_diffrn_standards_number        0
_diffrn_standards_interval_count  ?
_diffrn_standards_interval_time  ?
_diffrn_standards_decay_%       ?

```

```
_refine_special_details
```

```
;
```

Refinement of  $\langle F \rangle^2$  against ALL reflections. The weighted  $\langle R \rangle$ -factor  $\langle wR \rangle$  and goodness of fit  $\langle S \rangle$  are based on  $\langle F \rangle^2$ , conventional  $\langle R \rangle$ -factors  $\langle R \rangle$  are based on  $\langle F \rangle$ , with  $\langle F \rangle$  set to zero for negative  $\langle F \rangle^2$ . The threshold expression of  $\langle F \rangle^2 >$

$\sqrt{\langle F \rangle^2}$  is used only for calculating  $\langle R \rangle$ -factors(gt) etc.

and is not relevant to the choice of reflections for refinement.

$\langle R \rangle$ -factors based on  $\langle F \rangle^2$  are statistically about twice as large as those based on  $\langle F \rangle$ , and  $\langle R \rangle$ -factors based on ALL data will be even larger.

```
;
```

```
_reflms_number_total           4128
```

\_reflns\_number\_gt 2516  
 \_reflns\_threshold\_expression I>2\sigma(I)  
 \_refine\_ls\_structure\_factor\_coef Fsqd  
 \_refine\_ls\_matrix\_type full  
 \_refine\_ls\_R\_factor\_all 0.0865  
 \_refine\_ls\_R\_factor\_gt 0.0439  
 \_refine\_ls\_wR\_factor\_ref 0.1028  
 \_refine\_ls\_wR\_factor\_gt 0.0854  
 \_refine\_ls\_goodness\_of\_fit\_ref 1.008  
 \_refine\_ls\_restrained\_S\_all 1.008  
 \_refine\_ls\_number\_reflns 4128  
 \_refine\_ls\_number\_parameters 186  
 \_refine\_ls\_number\_restraints 0  
 \_refine\_ls\_hydrogen\_treatment constr  
 \_refine\_ls\_weighting\_scheme calc  
 \_refine\_ls\_weighting\_details  
 'w=1/[\sigma^2(Fo^2)+(0.0335P)^2+0.5542P] where P=(Fo^2+2Fc^2)/3'  
 \_atom\_sites\_solution\_hydrogens geom  
 \_atom\_sites\_solution\_primary direct  
 \_atom\_sites\_solution\_secondary difmap  
 \_refine\_ls\_extinction\_method ?  
 \_refine\_ls\_extinction\_coef ?  
 \_refine\_ls\_extinction\_expression ?  
 \_refine\_ls\_shift/su\_max 0.001  
 \_refine\_ls\_shift/su\_mean 0.000

\_computing\_data\_collection 'APEX2 (Bruker, 2007)'  
\_computing\_cell\_refinement 'SAINT (Bruker, 2007)'  
\_computing\_data\_reduction 'SAINT (Bruker, 2007)'  
\_computing\_structure\_solution 'SHELXS97 (Sheldrick, 2008)'  
\_computing\_structure\_refinement 'SHELXL-2018/3 (Sheldrick, 2015)'  
\_computing\_molecular\_graphics  
'ORTEP-3 for Windows (Farrugia, 1997) and PLATON (Spek, 2009)'  
\_computing\_publication\_material  
;  
WinGX (Farrugia, 1999) and PLATON (Spek, 2009)  
;

loop\_  
\_atom\_site\_label  
\_atom\_site\_type\_symbol  
\_atom\_site\_fract\_x  
\_atom\_site\_fract\_y  
\_atom\_site\_fract\_z  
\_atom\_site\_U\_iso\_or\_equiv  
\_atom\_site\_adp\_type  
\_atom\_site\_occupancy  
\_atom\_site\_site\_symmetry\_order  
\_atom\_site\_calc\_flag  
\_atom\_site\_refinement\_flags\_posn  
\_atom\_site\_refinement\_flags\_adp



\_atom\_site\_refinement\_flags\_occupancy

\_atom\_site\_disorder\_assembly

\_atom\_site\_disorder\_group

I1 I 0.45875(2) 0.39458(8) 0.66274(3) 0.07566(18) Uani 1 1 d . . . . .  
I2 I 0.39585(2) 1.15348(7) 0.39836(3) 0.06292(16) Uani 1 1 d . . . . .  
O1 O -0.1232(2) 0.4065(8) 0.3062(3) 0.0895(16) Uani 1 1 d . . . . .  
O2 O -0.0980(2) 0.1275(10) 0.4028(3) 0.1002(18) Uani 1 1 d . . . . .  
H2 H -0.136604 0.100902 0.391981 0.150 Uiso 1 1 calc R U . . .  
O3 O 0.25903(17) 0.9415(7) 0.4034(2) 0.0587(10) Uani 1 1 d . . . . .  
H3 H 0.223899 0.873688 0.398937 0.088 Uiso 1 1 calc R U . . .  
N1 N 0.1740(2) 0.6403(8) 0.4369(3) 0.0510(11) Uani 1 1 d . . . . .  
C1 C -0.0845(3) 0.3150(12) 0.3590(4) 0.0647(17) Uani 1 1 d . . . . .  
C2A C -0.0156(3) 0.3841(16) 0.3762(5) 0.0532(8) Uani 0.538(13) 1 d G . P A 1  
C3A C 0.0298(4) 0.2338(16) 0.4255(6) 0.0532(8) Uani 0.538(13) 1 d G . P A 1  
H3A H 0.017819 0.079068 0.444734 0.064 Uiso 0.538(13) 1 calc R U P A 1  
C4A C 0.0930(3) 0.3147(17) 0.4460(6) 0.0532(8) Uani 0.538(13) 1 d G . P A 1  
H4A H 0.123401 0.214096 0.478992 0.064 Uiso 0.538(13) 1 calc R U P A 1  
C5A C 0.1109(3) 0.5459(15) 0.4173(5) 0.0532(8) Uani 0.538(13) 1 d G . P A 1  
C6A C 0.0655(4) 0.6962(13) 0.3680(6) 0.0532(8) Uani 0.538(13) 1 d G . P A 1  
H6A H 0.077490 0.850917 0.348811 0.064 Uiso 0.538(13) 1 calc R U P A 1  
C7A C 0.0023(4) 0.6153(15) 0.3475(5) 0.0532(8) Uani 0.538(13) 1 d G . P A 1  
H7A H -0.028092 0.715893 0.314552 0.064 Uiso 0.538(13) 1 calc R U P A 1  
C2B C -0.0176(3) 0.4016(18) 0.3829(6) 0.0532(8) Uani 0.462(13) 1 d G . P A 2  
C3B C 0.0222(4) 0.316(2) 0.4520(6) 0.0532(8) Uani 0.462(13) 1 d G . P A 2  
H3B H 0.006099 0.208312 0.485645 0.064 Uiso 0.462(13) 1 calc R U P A 2

C4B C 0.0860(4) 0.390(2) 0.4709(6) 0.0532(8) Uani 0.462(13) 1 d G . P A 2  
 H4B H 0.112558 0.332907 0.517125 0.064 Uiso 0.462(13) 1 calc R U P A 2  
 C5B C 0.1100(3) 0.5509(17) 0.4206(6) 0.0532(8) Uani 0.462(13) 1 d G . P A 2  
 C6B C 0.0702(5) 0.637(2) 0.3515(6) 0.0532(8) Uani 0.462(13) 1 d G . P A 2  
 H6B H 0.086272 0.744289 0.317931 0.064 Uiso 0.462(13) 1 calc R U P A 2  
 C7B C 0.0064(5) 0.562(2) 0.3327(5) 0.0532(8) Uani 0.462(13) 1 d G . P A 2  
 H7B H -0.020186 0.619695 0.286449 0.064 Uiso 0.462(13) 1 calc R U P A 2  
 C8 C 0.2174(3) 0.5400(11) 0.4899(4) 0.0546(14) Uani 1 1 d . . . . .  
 H8 H 0.206455 0.408753 0.520575 0.065 Uiso 1 1 calc R U . . .  
 C9 C 0.2824(2) 0.6230(9) 0.5036(3) 0.0475(13) Uani 1 1 d . . . . .  
 C10 C 0.3011(2) 0.8222(9) 0.4582(3) 0.0464(13) Uani 1 1 d . . . . .  
 C11 C 0.3660(2) 0.8848(8) 0.4711(3) 0.0441(13) Uani 1 1 d . . . . .  
 C12 C 0.4104(2) 0.7678(9) 0.5286(3) 0.0495(13) Uani 1 1 d . . . . .  
 H12 H 0.453215 0.814285 0.536611 0.059 Uiso 1 1 calc R U . . .  
 C13 C 0.3915(2) 0.5791(9) 0.5749(3) 0.0510(14) Uani 1 1 d . . . . .  
 C14 C 0.3285(3) 0.5055(11) 0.5608(3) 0.0532(14) Uani 1 1 d . . . . .  
 H14 H 0.316472 0.373429 0.590405 0.064 Uiso 1 1 calc R U . . .  
 S1 S 0.25533(7) 0.3760(3) 0.20204(10) 0.0595(4) Uani 1 1 d . . . . .  
 O4 O 0.21352(19) 0.4436(8) 0.1234(2) 0.0776(13) Uani 1 1 d . . . . .  
 C15 C 0.2085(3) 0.3928(11) 0.2726(4) 0.0736(18) Uani 1 1 d . . . . .  
 H15A H 0.234683 0.357284 0.323515 0.110 Uiso 1 1 calc R U . . .  
 H15B H 0.174689 0.268631 0.260502 0.110 Uiso 1 1 calc R U . . .  
 H15C H 0.190561 0.561848 0.272309 0.110 Uiso 1 1 calc R U . . .  
 C16 C 0.3032(4) 0.6479(12) 0.2314(5) 0.104(3) Uani 1 1 d . . . . .  
 H16A H 0.337971 0.649890 0.204937 0.157 Uiso 1 1 calc R U . . .

H16B H 0.319851 0.641889 0.287121 0.157 Uiso 1 1 calc R U . . .

H16C H 0.277934 0.800356 0.218342 0.157 Uiso 1 1 calc R U . . .

loop\_

\_atom\_site\_aniso\_label

\_atom\_site\_aniso\_U\_11

\_atom\_site\_aniso\_U\_22

\_atom\_site\_aniso\_U\_33

\_atom\_site\_aniso\_U\_23

\_atom\_site\_aniso\_U\_13

\_atom\_site\_aniso\_U\_12

I1 0.0621(3) 0.0898(3) 0.0635(3) 0.0171(2) -0.0114(2) 0.0019(2)

I2 0.0504(2) 0.0675(3) 0.0693(3) 0.0146(2) 0.0097(2) -0.00866(17)

O1 0.053(3) 0.090(3) 0.111(4) 0.019(3) -0.012(3) -0.012(2)

O2 0.059(3) 0.141(4) 0.090(4) 0.033(3) -0.007(3) -0.042(3)

O3 0.046(2) 0.066(2) 0.060(3) 0.014(2) 0.002(2) -0.0052(18)

N1 0.040(3) 0.069(3) 0.045(3) -0.003(2) 0.011(2) -0.005(2)

C1 0.053(4) 0.080(4) 0.059(5) -0.002(4) 0.008(3) -0.014(3)

C2A 0.0469(15) 0.0647(19) 0.047(2) -0.0015(14) 0.0073(13) -0.0040(13)

C3A 0.0469(15) 0.0647(19) 0.047(2) -0.0015(14) 0.0073(13) -0.0040(13)

C4A 0.0469(15) 0.0647(19) 0.047(2) -0.0015(14) 0.0073(13) -0.0040(13)

C5A 0.0469(15) 0.0647(19) 0.047(2) -0.0015(14) 0.0073(13) -0.0040(13)

C6A 0.0469(15) 0.0647(19) 0.047(2) -0.0015(14) 0.0073(13) -0.0040(13)

C7A 0.0469(15) 0.0647(19) 0.047(2) -0.0015(14) 0.0073(13) -0.0040(13)

C2B 0.0469(15) 0.0647(19) 0.047(2) -0.0015(14) 0.0073(13) -0.0040(13)

C3B 0.0469(15) 0.0647(19) 0.047(2) -0.0015(14) 0.0073(13) -0.0040(13)  
 C4B 0.0469(15) 0.0647(19) 0.047(2) -0.0015(14) 0.0073(13) -0.0040(13)  
 C5B 0.0469(15) 0.0647(19) 0.047(2) -0.0015(14) 0.0073(13) -0.0040(13)  
 C6B 0.0469(15) 0.0647(19) 0.047(2) -0.0015(14) 0.0073(13) -0.0040(13)  
 C7B 0.0469(15) 0.0647(19) 0.047(2) -0.0015(14) 0.0073(13) -0.0040(13)  
 C8 0.045(3) 0.068(3) 0.051(4) 0.004(3) 0.011(3) -0.007(3)  
 C9 0.037(3) 0.066(3) 0.041(3) -0.002(3) 0.009(3) 0.000(2)  
 C10 0.044(3) 0.051(3) 0.041(3) 0.001(3) 0.003(3) 0.003(2)  
 C11 0.038(3) 0.049(3) 0.045(4) -0.003(2) 0.007(3) -0.002(2)  
 C12 0.037(3) 0.058(3) 0.052(4) -0.002(3) 0.007(3) -0.004(2)  
 C13 0.045(3) 0.059(3) 0.046(4) 0.002(3) 0.002(3) 0.001(2)  
 C14 0.057(4) 0.068(3) 0.036(4) 0.007(3) 0.014(3) -0.003(3)  
 S1 0.0603(9) 0.0607(9) 0.0553(10) -0.0049(7) 0.0079(8) 0.0158(7)  
 O4 0.063(3) 0.117(3) 0.050(3) -0.007(2) 0.005(2) 0.031(2)  
 C15 0.077(5) 0.088(5) 0.056(4) 0.003(3) 0.014(4) 0.001(3)  
 C16 0.120(7) 0.096(5) 0.093(7) 0.012(4) 0.013(5) -0.040(4)

\_geom\_special\_details

;

All esds (except the esd in the dihedral angle between two l.s. planes)  
 are estimated using the full covariance matrix. The cell esds are taken  
 into account individually in the estimation of esds in distances, angles  
 and torsion angles; correlations between esds in cell parameters are only  
 used when they are defined by crystal symmetry. An approximate (isotropic)  
 treatment of cell esds is used for estimating esds involving l.s. planes.

;

loop\_

\_geom\_bond\_atom\_site\_label\_1

\_geom\_bond\_atom\_site\_label\_2

\_geom\_bond\_distance

\_geom\_bond\_site\_symmetry\_2

\_geom\_bond\_publ\_flag

I1 C13 2.095(5) . ?

I2 C11 2.083(5) . ?

O1 C1 1.196(7) . ?

O2 C1 1.311(7) . ?

O2 H2 0.8200 . ?

O3 C10 1.318(6) . ?

O3 H3 0.8200 . ?

N1 C8 1.271(7) . ?

N1 C5A 1.410(7) . ?

N1 C5B 1.419(8) . ?

C1 C2B 1.473(9) . ?

C1 C2A 1.485(8) . ?

C2A C3A 1.3900 . ?

C2A C7A 1.3900 . ?

C3A C4A 1.3900 . ?

C3A H3A 0.9300 . ?

C4A C5A 1.3900 . ?

C4A H4A 0.9300 . ?

C5A C6A 1.3900 . ?

C6A C7A 1.3900 . ?

C6A H6A 0.9300 . ?

C7A H7A 0.9300 . ?

C2B C3B 1.3900 . ?

C2B C7B 1.3900 . ?

C3B C4B 1.3900 . ?

C3B H3B 0.9300 . ?

C4B C5B 1.3900 . ?

C4B H4B 0.9300 . ?

C5B C6B 1.3900 . ?

C6B C7B 1.3900 . ?

C6B H6B 0.9300 . ?

C7B H7B 0.9300 . ?

C8 C9 1.429(7) . ?

C8 H8 0.9300 . ?

C9 C14 1.383(7) . ?

C9 C10 1.416(7) . ?

C10 C11 1.398(7) . ?

C11 C12 1.366(7) . ?

C12 C13 1.388(7) . ?

C12 H12 0.9300 . ?

C13 C14 1.373(7) . ?

C14 H14 0.9300 . ?

S1 O4 1.508(4) . ?

S1 C15 1.754(6) . ?

S1 C16 1.758(6) . ?

C15 H15A 0.9600 . ?

C15 H15B 0.9600 . ?

C15 H15C 0.9600 . ?

C16 H16A 0.9600 . ?

C16 H16B 0.9600 . ?

C16 H16C 0.9600 . ?

loop\_

\_geom\_angle\_atom\_site\_label\_1

\_geom\_angle\_atom\_site\_label\_2

\_geom\_angle\_atom\_site\_label\_3

\_geom\_angle

\_geom\_angle\_site\_symmetry\_1

\_geom\_angle\_site\_symmetry\_3

\_geom\_angle\_publ\_flag

C1 O2 H2 109.5 . . ?

C10 O3 H3 109.5 . . ?

C8 N1 C5A 122.9(5) . . ?

C8 N1 C5B 122.1(6) . . ?

O1 C1 O2 122.7(6) . . ?

O1 C1 C2B 124.4(7) . . ?

O2 C1 C2B 112.8(7) . . ?

O1 C1 C2A 123.5(7) . . ?  
O2 C1 C2A 113.5(6) . . ?  
C3A C2A C7A 120.0 . . ?  
C3A C2A C1 121.3(6) . . ?  
C7A C2A C1 118.5(6) . . ?  
C2A C3A C4A 120.0 . . ?  
C2A C3A H3A 120.0 . . ?  
C4A C3A H3A 120.0 . . ?  
C5A C4A C3A 120.0 . . ?  
C5A C4A H4A 120.0 . . ?  
C3A C4A H4A 120.0 . . ?  
C6A C5A C4A 120.0 . . ?  
C6A C5A N1 117.3(6) . . ?  
C4A C5A N1 122.7(6) . . ?  
C5A C6A C7A 120.0 . . ?  
C5A C6A H6A 120.0 . . ?  
C7A C6A H6A 120.0 . . ?  
C6A C7A C2A 120.0 . . ?  
C6A C7A H7A 120.0 . . ?  
C2A C7A H7A 120.0 . . ?  
C3B C2B C7B 120.0 . . ?  
C3B C2B C1 121.4(7) . . ?  
C7B C2B C1 118.5(7) . . ?  
C4B C3B C2B 120.0 . . ?  
C4B C3B H3B 120.0 . . ?



C2B C3B H3B 120.0 . . ?  
C3B C4B C5B 120.0 . . ?  
C3B C4B H4B 120.0 . . ?  
C5B C4B H4B 120.0 . . ?  
C6B C5B C4B 120.0 . . ?  
C6B C5B N1 116.8(7) . . ?  
C4B C5B N1 123.2(7) . . ?  
C5B C6B C7B 120.0 . . ?  
C5B C6B H6B 120.0 . . ?  
C7B C6B H6B 120.0 . . ?  
C6B C7B C2B 120.0 . . ?  
C6B C7B H7B 120.0 . . ?  
C2B C7B H7B 120.0 . . ?  
N1 C8 C9 121.9(5) . . ?  
N1 C8 H8 119.0 . . ?  
C9 C8 H8 119.0 . . ?  
C14 C9 C10 118.9(5) . . ?  
C14 C9 C8 120.2(5) . . ?  
C10 C9 C8 120.8(5) . . ?  
O3 C10 C11 120.4(5) . . ?  
O3 C10 C9 121.3(5) . . ?  
C11 C10 C9 118.3(5) . . ?  
C12 C11 C10 121.6(5) . . ?  
C12 C11 I2 119.3(4) . . ?  
C10 C11 I2 119.1(4) . . ?

C11 C12 C13 119.8(5) . . ?

C11 C12 H12 120.1 . . ?

C13 C12 H12 120.1 . . ?

C14 C13 C12 119.7(5) . . ?

C14 C13 I1 119.7(4) . . ?

C12 C13 I1 120.6(4) . . ?

C13 C14 C9 121.6(5) . . ?

C13 C14 H14 119.2 . . ?

C9 C14 H14 119.2 . . ?

O4 S1 C15 108.1(3) . . ?

O4 S1 C16 105.7(3) . . ?

C15 S1 C16 98.2(4) . . ?

S1 C15 H15A 109.5 . . ?

S1 C15 H15B 109.5 . . ?

H15A C15 H15B 109.5 . . ?

S1 C15 H15C 109.5 . . ?

H15A C15 H15C 109.5 . . ?

H15B C15 H15C 109.5 . . ?

S1 C16 H16A 109.5 . . ?

S1 C16 H16B 109.5 . . ?

H16A C16 H16B 109.5 . . ?

S1 C16 H16C 109.5 . . ?

H16A C16 H16C 109.5 . . ?

H16B C16 H16C 109.5 . . ?

loop\_

\_geom\_torsion\_atom\_site\_label\_1

\_geom\_torsion\_atom\_site\_label\_2

\_geom\_torsion\_atom\_site\_label\_3

\_geom\_torsion\_atom\_site\_label\_4

\_geom\_torsion

\_geom\_torsion\_site\_symmetry\_1

\_geom\_torsion\_site\_symmetry\_2

\_geom\_torsion\_site\_symmetry\_3

\_geom\_torsion\_site\_symmetry\_4

\_geom\_torsion\_publ\_flag

O1 C1 C2A C3A -164.9(7) . . . . ?

O2 C1 C2A C3A 9.4(9) . . . . ?

O1 C1 C2A C7A 20.5(10) . . . . ?

O2 C1 C2A C7A -165.1(7) . . . . ?

C7A C2A C3A C4A 0.0 . . . . ?

C1 C2A C3A C4A -174.4(7) . . . . ?

C2A C3A C4A C5A 0.0 . . . . ?

C3A C4A C5A C6A 0.0 . . . . ?

C3A C4A C5A N1 179.0(7) . . . . ?

C8 N1 C5A C6A 169.5(6) . . . . ?

C8 N1 C5A C4A -9.6(9) . . . . ?

C4A C5A C6A C7A 0.0 . . . . ?

N1 C5A C6A C7A -179.1(7) . . . . ?

C5A C6A C7A C2A 0.0 . . . . ?

C3A C2A C7A C6A 0.0 . . . . ?

C1 C2A C7A C6A 174.6(7) . . . . ?

O1 C1 C2B C3B 169.7(7) . . . . ?

O2 C1 C2B C3B -9.1(9) . . . . ?

O1 C1 C2B C7B -13.7(11) . . . . ?

O2 C1 C2B C7B 167.5(7) . . . . ?

C7B C2B C3B C4B 0.0 . . . . ?

C1 C2B C3B C4B 176.6(8) . . . . ?

C2B C3B C4B C5B 0.0 . . . . ?

C3B C4B C5B C6B 0.0 . . . . ?

C3B C4B C5B N1 178.4(8) . . . . ?

C8 N1 C5B C6B -166.8(6) . . . . ?

C8 N1 C5B C4B 14.7(10) . . . . ?

C4B C5B C6B C7B 0.0 . . . . ?

N1 C5B C6B C7B -178.5(8) . . . . ?

C5B C6B C7B C2B 0.0 . . . . ?

C3B C2B C7B C6B 0.0 . . . . ?

C1 C2B C7B C6B -176.7(8) . . . . ?

C5A N1 C8 C9 173.9(6) . . . . ?

C5B N1 C8 C9 177.2(6) . . . . ?

N1 C8 C9 C14 -178.7(5) . . . . ?

N1 C8 C9 C10 0.0(8) . . . . ?

C14 C9 C10 O3 -179.5(5) . . . . ?

C8 C9 C10 O3 1.8(8) . . . . ?

C14 C9 C10 C11 2.4(8) . . . . ?

C8 C9 C10 C11 -176.2(5) . . . . ?  
O3 C10 C11 C12 178.7(5) . . . . ?  
C9 C10 C11 C12 -3.2(8) . . . . ?  
O3 C10 C11 I2 -3.6(7) . . . . ?  
C9 C10 C11 I2 174.5(4) . . . . ?  
C10 C11 C12 C13 0.9(8) . . . . ?  
I2 C11 C12 C13 -176.8(4) . . . . ?  
C11 C12 C13 C14 2.2(8) . . . . ?  
C11 C12 C13 I1 179.5(4) . . . . ?  
C12 C13 C14 C9 -3.0(8) . . . . ?  
I1 C13 C14 C9 179.7(4) . . . . ?  
C10 C9 C14 C13 0.7(8) . . . . ?  
C8 C9 C14 C13 179.3(5) . . . . ?

loop\_

\_geom\_hbond\_atom\_site\_label\_D

\_geom\_hbond\_atom\_site\_label\_H

\_geom\_hbond\_atom\_site\_label\_A

\_geom\_hbond\_distance\_DH

\_geom\_hbond\_distance\_HA

\_geom\_hbond\_distance\_DA

\_geom\_hbond\_angle\_DHA

\_geom\_hbond\_site\_symmetry\_A

\_geom\_hbond\_publ\_flag

O2 H2 S1 0.82 2.95 3.707(4) 154.1 2\_545 yes

O2 H2 O4 0.82 1.81 2.601(5) 162.4 2\_545 yes  
 O3 H3 N1 0.82 1.84 2.567(5) 147.9 . yes  
 C6B^b H6B^b O1 0.93 2.61 3.496(9) 160.4 2 yes  
 C8 H8 O4 0.93 2.55 3.445(7) 162.2 4\_566 yes  
 C12 H12 I2 0.93 3.19 4.090(5) 163.4 3\_676 yes  
 C14 H14 S1 0.93 2.89 3.767(6) 158.5 4\_566 yes  
 C15 H15A O3 0.96 2.57 3.290(7) 132.4 1\_545 yes  
 C15 H15B O1 0.96 2.36 3.247(7) 153.6 2\_545 yes  
 C15 H15C O1 0.96 2.51 3.359(7) 147.0 2 yes

\_refine\_diff\_density\_max 0.868

\_refine\_diff\_density\_min -0.754

\_refine\_diff\_density\_rms 0.105

\_shelx\_res\_file

;

TITL 4ABA35DIIODO in P2(1)/c ORANGE NEEDLE

shelx.res

created by SHELXL-2018/3 at 14:44:43 on 31-Jan-2021

CELL 0.71073 21.4407 5.2059 17.4652 90.000 102.673 90.000

ZERR 4.00 0.0039 0.0009 0.0040 0.000 0.010 0.000

LATT 1

SYMM -x, y+1/2, -z+1/2

SFAC C H N O S I

UNIT 64 60 4 16 4 8

OMIT -3 54

L.S. 40

ACTA

BOND \$H

HTAB

CONF

LIST 4

FMAP 2

PLAN 15

TEMP 23.000

SIZE 0.43 0.20 0.14

OMIT-2 0 2

OMIT 2 0 0

OMIT 1 0 0

OMIT-1 0 2

EADP C2A C3A C4A C5A C6A C7A C2B C3B C4B C5B C6B C7B

EQIV \$1 -x, y-1/2, -z+1/2

HTAB O2 S1\_\$1

HTAB O2 O4\_\$1

HTAB O3 N1

EQIV \$2 -x, y+1/2, -z+1/2

HTAB C6B O1\_\$2

EQIV \$3 x, -y+1/2, z+1/2

HTAB C8 O4\_\$3

EQIV \$4 -x+1, -y+2, -z+1

HTAB C12 I2\_\$4

HTAB C14 S1\_\$3

EQIV \$5 x, y-1, z

HTAB C15 O3\_\$5

HTAB C15 O1\_\$1

HTAB C15 O1\_\$2

MPLA 3 C1 O1 O2

MPLA 7 C2A C3A C4A C5A C6A C7A N1

MPLA 7 C2B C3B C4B C5B C6B C7B N1

MPLA 3 C1 O1 O2

MPLA 10 C8 C9 C10 C11 C12 C13 C14 O3 I1 I2

MPLA 7 C2A C3A C4A C5A C6A C7A N1

MPLA 7 C2B C3B C4B C5B C6B C7B N1

MPLA 10 C8 C9 C10 C11 C12 C13 C14 O3 I1 I2

WGHT 0.033500 0.554200

FVAR 0.07675 0.53764

MOLE 1

I1 6 0.458755 0.394577 0.662741 11.00000 0.06211 0.08982 =

0.06346 0.01710 -0.01138 0.00191

I2 6 0.395846 1.153480 0.398364 11.00000 0.05036 0.06752 =

0.06930 0.01461 0.00970 -0.00866

O1 4 -0.123202 0.406475 0.306199 11.00000 0.05340 0.08973 =

0.11142 0.01883 -0.01227 -0.01224

O2 4 -0.097969 0.127539 0.402760 11.00000 0.05928 0.14127 =



0.08960 0.03291 -0.00664 -0.04184

AFIX 147

H2 2 -0.136604 0.100902 0.391981 11.00000 -1.50000

AFIX 0

O3 4 0.259026 0.941521 0.403351 11.00000 0.04558 0.06638 =

0.05965 0.01401 0.00178 -0.00520

AFIX 147

H3 2 0.223899 0.873688 0.398937 11.00000 -1.50000

AFIX 0

N1 3 0.174047 0.640269 0.436854 11.00000 0.03982 0.06891 =

0.04527 -0.00297 0.01145 -0.00463

C1 1 -0.084457 0.315008 0.358959 11.00000 0.05266 0.08014 =

0.05906 -0.00184 0.00757 -0.01427

PART 1

AFIX 66

C2A 1 -0.015604 0.384091 0.376247 21.00000 0.04690 0.06474 =

0.04652 -0.00153 0.00729 -0.00396

C3A 1 0.029779 0.233770 0.425508 21.00000 0.04690 0.06474 =

0.04652 -0.00153 0.00729 -0.00396

AFIX 43

H3A 2 0.017819 0.079068 0.444734 21.00000 -1.20000

AFIX 65

C4A 1 0.093037 0.314671 0.446033 21.00000 0.04690 0.06474 =

0.04652 -0.00153 0.00729 -0.00396

AFIX 43

H4A 2 0.123401 0.214096 0.478992 21.00000 -1.20000

AFIX 65

C5A 1 0.110912 0.545892 0.417298 21.00000 0.04690 0.06474 =  
0.04652 -0.00153 0.00729 -0.00396

C6A 1 0.065530 0.696215 0.368037 21.00000 0.04690 0.06474 =  
0.04652 -0.00153 0.00729 -0.00396

AFIX 43

H6A 2 0.077490 0.850917 0.348811 21.00000 -1.20000

AFIX 65

C7A 1 0.002272 0.615317 0.347511 21.00000 0.04690 0.06474 =  
0.04652 -0.00153 0.00729 -0.00396

AFIX 43

H7A 2 -0.028092 0.715893 0.314552 21.00000 -1.20000

AFIX 66

PART 2

C2B 1 -0.017598 0.401650 0.382926 -21.00000 0.04690 0.06474 =  
0.04652 -0.00153 0.00729 -0.00396

C3B 1 0.022168 0.315738 0.452030 -21.00000 0.04690 0.06474 =  
0.04652 -0.00153 0.00729 -0.00396

AFIX 43

H3B 2 0.006099 0.208312 0.485645 -21.00000 -1.20000

AFIX 65

C4B 1 0.085952 0.390388 0.470891 -21.00000 0.04690 0.06474 =  
0.04652 -0.00153 0.00729 -0.00396

AFIX 43

H4B 2 0.112558 0.332907 0.517125 -21.00000 -1.20000

AFIX 65

C5B 1 0.109969 0.550949 0.420649 -21.00000 0.04690 0.06474 =  
0.04652 -0.00153 0.00729 -0.00396

C6B 1 0.070203 0.636862 0.351546 -21.00000 0.04690 0.06474 =  
0.04652 -0.00153 0.00729 -0.00396

AFIX 43

H6B 2 0.086272 0.744289 0.317931 -21.00000 -1.20000

AFIX 65

C7B 1 0.006420 0.562214 0.332683 -21.00000 0.04690 0.06474 =  
0.04652 -0.00153 0.00729 -0.00396

AFIX 43

H7B 2 -0.020186 0.619695 0.286449 -21.00000 -1.20000

AFIX 0

PART 0

C8 1 0.217390 0.540009 0.489857 11.00000 0.04530 0.06784 =  
0.05095 0.00403 0.01143 -0.00669

AFIX 43

H8 2 0.206455 0.408753 0.520575 11.00000 -1.20000

AFIX 0

C9 1 0.282409 0.623005 0.503633 11.00000 0.03666 0.06552 =  
0.04072 -0.00223 0.00909 0.00049

C10 1 0.301100 0.822179 0.458189 11.00000 0.04387 0.05138 =  
0.04099 0.00116 0.00278 0.00259

C11 1 0.365978 0.884838 0.471135 11.00000 0.03761 0.04873 =

AFIX 0

C16 1 0.303203 0.647879 0.231446 11.00000 0.11954 0.09631 =  
0.09254 0.01182 0.01277 -0.03983

AFIX 137

H16A 2 0.337971 0.649890 0.204937 11.00000 -1.50000

H16B 2 0.319851 0.641889 0.287121 11.00000 -1.50000

H16C 2 0.277934 0.800356 0.218342 11.00000 -1.50000

AFIX 0

HKLF 4 1 1 0 0 0 1 0 0 0 1

REM 4ABA35DIODO in P2(1)/c ORANGE NEEDLE

REM wR2 = 0.1028, GooF = S = 1.008, Restrained GooF = 1.008 for all data

REM R1 = 0.0439 for 2516 Fo > 4sig(Fo) and 0.0865 for all 4128 data

REM 186 parameters refined using 0 restraints

END

WGHT 0.0334 0.5617

REM Instructions for potential hydrogen bonds

HTAB O2 S1\_\$1

HTAB O2 O4\_\$1

HTAB O3 N1

HTAB C6B O1\_\$2

HTAB C8 O4\_\$3

HTAB C12 I2\_\$4

HTAB C14 S1\_\$3

HTAB C15 O3\_\$5

HTAB C15 O1\_\$1

HTAB C15 O1\_\$2

REM Highest difference peak 0.868, deepest hole -0.754, 1-sigma level 0.105

|     |   |         |        |        |          |      |      |
|-----|---|---------|--------|--------|----------|------|------|
| Q1  | 1 | 0.4502  | 0.5351 | 0.6716 | 11.00000 | 0.05 | 0.87 |
| Q2  | 1 | 0.4562  | 0.3355 | 0.6824 | 11.00000 | 0.05 | 0.73 |
| Q3  | 1 | 0.4687  | 0.3340 | 0.6153 | 11.00000 | 0.05 | 0.68 |
| Q4  | 1 | 0.3593  | 1.1709 | 0.3988 | 11.00000 | 0.05 | 0.65 |
| Q5  | 1 | 0.4003  | 0.9926 | 0.3888 | 11.00000 | 0.05 | 0.62 |
| Q6  | 1 | 0.4440  | 1.1881 | 0.4113 | 11.00000 | 0.05 | 0.61 |
| Q7  | 1 | 0.4090  | 0.3643 | 0.6515 | 11.00000 | 0.05 | 0.59 |
| Q8  | 1 | 0.4127  | 1.1438 | 0.4419 | 11.00000 | 0.05 | 0.50 |
| Q9  | 1 | -0.0182 | 0.5049 | 0.3711 | 11.00000 | 0.05 | 0.45 |
| Q10 | 1 | 0.2445  | 0.6183 | 0.1957 | 11.00000 | 0.05 | 0.41 |
| Q11 | 1 | 0.3359  | 0.1208 | 0.6326 | 11.00000 | 0.05 | 0.40 |
| Q12 | 1 | 0.5435  | 0.4131 | 0.6509 | 11.00000 | 0.05 | 0.39 |
| Q13 | 1 | 0.5075  | 0.3759 | 0.6691 | 11.00000 | 0.05 | 0.39 |
| Q14 | 1 | 0.0458  | 0.6216 | 0.3386 | 11.00000 | 0.05 | 0.39 |
| Q15 | 1 | 0.0011  | 0.3437 | 0.4091 | 11.00000 | 0.05 | 0.38 |

;
